# Supplementary material for: Identification of frailty-associated genes by coordination analysis of gene expression
Source: Aging (Albany NY). 2020 Feb 29;12(5):4222–9. doi: 10.18632/aging.102875 (PMC7093164; doi:10.18632/aging.102875)
Supplement: Supplementary Table 1 [file aging-12-102875-s002..xlsx]

## Sheet: R values vs transcriptome
gene symbol	R vs TSIX NOR	R vs TSIX FRA	R vs BEST1 NOR	R vs BEST1 FRA	R vs ADAMTSL4 NOR	R vs ADAMTSL4 FRA
BEST1	-0.196127	-0.186382	1	1	0.512363	0.297261
CD300LB	-0.520542	-0.0850319	0.300831	0.964712	0.736044	0.353172
HCST	-0.32456	-0.383172	0.609442	0.956685	0.738637	0.130323
PPP1R15A	0.173622	-0.183046	0.592256	0.939818	0.626887	0.445987
TMBIM4	-0.268964	0.127722	0.80026	0.936569	0.57936	0.538329
ZNF425	-0.158167	-0.0141347	0.0415235	0.935664	0.56024	0.434588
SNORA16B	-0.346487	0.0224041	-0.439522	0.933677	0.0819058	0.518896
GABARAPL1	-0.245409	-0.22185	0.710329	0.931837	0.888769	0.0593526
UBE2J2	-0.406956	-0.325657	0.391583	0.928688	0.694806	-0.0193833
IER2	-0.613548	-0.102649	0.611298	0.918623	0.867079	0.370252
HLA-DRB1	-0.483548	-0.271591	0.274876	0.917168	0.611469	0.223539
CD14	-0.236578	0.0777112	0.552937	0.911172	0.742376	0.606769
TMEM40	0.422281	-0.0292976	0.380351	0.9104	0.167035	0.492799
RYR1	-0.0249503	-0.295669	0.201775	0.899781	0.547421	0.122099
CDK2	-0.301388	-0.284269	0.256222	0.899417	0.53082	0.0300303
IGSF5	0.354592	-0.184472	-0.192473	0.898576	0.145482	0.23879
CTTNBP2NL	0.116476	0.0990267	0.617605	0.896203	0.0936073	0.504885
SLC25A20	-0.172081	0.0990267	0.164904	0.896203	0.165377	0.504885
PROSC	0.777445	0.197784	0.0857751	0.893905	-0.290749	0.43499
TAPT1	0.0280434	0.0825367	0.720448	0.893127	0.0218425	0.393575
ME3	-0.586997	-0.0206899	0.348017	0.891679	-0.0159774	0.491855
ASF1B	0.020169	-0.173581	0.395918	0.891515	-0.27785	0.108116
SLC43A2	0.0306344	0.143958	0.259893	0.890324	0.543187	0.470105
LRRC61	0.0732185	0.0571703	-0.0341112	0.887676	-0.512697	0.389901
FAM153B	-0.551787	0.0140245	0.498484	0.886344	0.309435	0.389466
APOA2	-0.0564537	-0.0307904	0.424899	0.88453	0.631598	0.572928
NMI	-0.350523	-0.0378308	0.445488	0.884489	0.590957	0.216125
PRDX2	-0.329733	0.160396	0.804645	0.881197	0.542718	0.398155
TMEM176B	-0.0167207	0.170226	0.522563	0.876506	-0.083967	0.571762
TYW1B	-0.425956	0.0687453	0.24609	0.87453	-0.144808	0.60586
LOC100506229	-0.0535468	-0.439893	0.410691	0.872537	0.409843	-0.0288589
C3AR1	-0.0055708	-0.549716	0.625203	0.86963	0.447112	-0.0371623
GCH1	-0.102512	-0.0391181	0.276986	0.869281	0.816772	0.5806
MEN1	0.264872	0.237463	-0.0610153	0.867815	-0.221831	0.514036
MARCKS	0.0903	-0.087274	0.119699	0.867448	0.378232	0.344759
NPFFR2	-0.147071	0.123719	0.658276	0.866696	0.000881008	0.515757
IQCD	0.0141457	0.126638	-0.305299	0.866332	0.280439	0.31063
KIF23	0.294292	0.0137772	0.386032	0.865918	0.401047	0.24452
PHACTR3	0.0741828	0.299988	-0.0833368	0.865882	0.112143	0.642466
HEATR2	0.649831	0.299988	-0.457781	0.865882	-0.595935	0.642466
LONRF1	-0.279074	-0.489966	0.488216	0.864587	0.666581	-0.0659452
KDELR1	-0.340839	-0.0680624	0.601619	0.862136	0.0127415	0.146879
ZNF22	-0.340839	-0.0680624	0.601619	0.862136	0.0127415	0.146879
MIR3916	-0.182023	-0.0680624	0.576508	0.862136	0.101022	0.146879
KRTAP4-11	-0.202286	-0.0680624	0.42125	0.862136	0.568131	0.146879
WWC2	0.0347456	-0.0680624	0.389285	0.862136	-0.221506	0.146879
UPRT	0.154729	-0.0680624	0.308612	0.862136	0.475432	0.146879
SMAD1	-0.0873862	-0.0680624	0.239254	0.862136	0.833137	0.146879
ZNF680	-0.128416	-0.0680624	0.137437	0.862136	0.366449	0.146879
YIPF3	-0.737312	-0.0680624	-0.108745	0.862136	-0.050152	0.146879
RASSF7	0.152043	-0.0680624	-0.197731	0.862136	0.43824	0.146879
ALOX15B	-0.0495176	-0.0680624	-0.234034	0.862136	0.217102	0.146879
MOCS1	-0.498898	-0.0680624	-0.236894	0.862136	0.585695	0.146879
NUBP1	-0.281251	0.0370557	0.285722	0.86167	0.359157	0.266137
ABAT	-0.344085	0.0526145	-0.0117195	0.860267	-0.214795	0.430959
GPCPD1	-0.286723	0.18217	0.151053	0.859526	-0.0189638	0.600631
PADI2	-0.669387	0.0184983	0.0792921	0.858437	0.185375	0.4318
RANBP3	-0.173184	0.299199	0.402071	0.855663	0.359044	0.511294
NSUN7	-0.340839	-0.0513391	0.601619	0.855475	0.0127415	0.379856
TEPP	0.0347456	-0.0513391	0.389285	0.855475	-0.221506	0.379856
MIR548Q	-0.535735	-0.0513391	0.156399	0.855475	0.319748	0.379856
SNORA56	-0.321933	-0.0513391	0.00221636	0.855475	0.512814	0.379856
APIP	0.418279	-0.0513391	-0.190069	0.855475	-0.349785	0.379856
FAM180B	-0.136382	-0.278532	-0.0301218	0.854368	-0.181957	0.291675
ARFGAP1	-0.239829	0.317087	0.697185	0.853838	0.404455	0.60794
ZNF804A	-0.351903	0.323631	-0.481251	0.85271	0.356038	0.66471
LAMP2	-0.626489	0.297135	0.568822	0.852533	0.85757	0.738541
BMF	-0.115102	-0.562885	0.0935926	0.850459	0.209221	-0.123515
KDM5B	0.493341	0.048869	0.207017	0.849931	0.109819	0.277364
SFRP5	0.059711	0.193553	0.329497	0.849842	-0.14345	0.688935
NFKBIA	-0.183767	-0.167555	0.531164	0.849727	0.713603	0.249221
EIF6	0.0692753	0.143963	0.187595	0.848492	-0.148282	0.509535
UBA6	-0.28243	-0.0916262	0.789549	0.84792	0.0632626	0.478283
B9D2	-0.141132	0.0421644	0.692613	0.845595	0.663655	0.502337
IL17RE	0.464497	-0.238285	-0.507452	0.845329	-0.477501	0.0426025
IER5	0.110321	-0.0402375	0.456164	0.841371	0.508528	0.569557
TBCA	0.00026591	0.25859	0.70456	0.840958	0.168739	0.422249
BIRC5	-0.273688	-0.310837	0.359461	0.837609	0.236151	-0.0213387
CD22	-0.459749	0.0509517	0.774751	0.836874	0.490305	0.453061
HP	-0.140444	0.0230131	-0.392047	0.83616	0.0751614	0.309095
DENND5A	-0.406985	0.290417	0.529077	0.835244	0.674755	0.576798
CPSF6	0.0296027	0.242685	0.47558	0.834032	-0.0270475	0.600487
MIR4665	-0.0691516	0.159516	0.373052	0.83334	-0.0333863	0.723119
GRINA	-0.125009	0.270015	-0.530981	0.831345	0.140726	0.532905
THBS1	-0.29207	-0.221874	-0.130341	0.830143	0.50283	0.112568
SOX10	-0.296116	0.315934	0.424151	0.827732	0.128098	0.657509
SLC47A2	-0.234653	0.163664	0.153889	0.827712	0.390108	0.422671
TSPY26P	-0.340839	-0.1009	0.601619	0.827208	0.0127415	0.154184
RRM1	-0.0901888	-0.1009	0.591425	0.827208	-0.0737815	0.154184
ST14	0.328371	-0.1009	0.510215	0.827208	0.181937	0.154184
TMTC2	0.353477	-0.1009	0.48618	0.827208	0.0279666	0.154184
LOC728392	0.0347456	-0.1009	0.389285	0.827208	-0.221506	0.154184
CDC42EP1	-0.535735	-0.1009	0.156399	0.827208	0.319748	0.154184
MIR4734	0.102514	-0.1009	0.153207	0.827208	0.119527	0.154184
ARHGEF17	-0.555997	-0.1009	0.0011416	0.827208	0.786857	0.154184
SNX13	-0.293996	-0.1009	-0.304351	0.827208	0.442564	0.154184
HCK	0.166784	-0.262641	0.0396987	0.825576	0.39008	0.352675
PTTG1IP	-0.447585	0.0972894	-0.197142	0.825126	0.429068	0.384995
SMG9	-0.668546	-0.333606	0.0964736	0.823916	0.677654	0.179371
C9orf169	-0.0371686	-0.131542	-0.612081	0.821272	-0.14865	0.134791
ZNF414	-0.413767	-0.444745	0.787761	0.821167	0.516856	0.0576568
DMXL2	-0.561286	-0.33836	0.668615	0.821027	0.673752	0.0451706
PCBP1	-0.186613	0.0344891	0.624277	0.819661	0.137719	0.293225
POU1F1	0.130094	-0.390663	0.519401	0.819126	-0.0666578	-0.166569
INPP5B	-0.243591	-0.0425458	0.670771	0.81675	0.779676	0.3654
CYBB	0.198792	-0.312517	0.125682	0.816667	0.464258	0.0127429
CAT	-0.252967	0.0303788	-0.0903454	0.815995	0.274907	0.488775
ODF3B	-0.578805	-0.195884	0.670373	0.815191	0.724602	0.360145
HIVEP3	0.546134	0.0465113	-0.0754826	0.813171	-0.214178	0.123586
SERPINB6	-0.256023	0.125845	0.238017	0.813083	0.309793	0.674479
SLC35A5	-0.449804	-0.208899	-0.165848	0.812276	0.210182	0.289535
MAP2K3	-0.144135	0.152158	0.327704	0.811629	0.757525	0.450156
KIAA1524	0.421491	0.173146	0.205747	0.811485	-0.242471	0.523654
B3GAT3	-0.0334295	-0.0755611	0.934938	0.810723	0.2882	0.482039
C16orf59	-0.0804846	-0.0755611	0.815745	0.810723	0.217102	0.482039
ACOT9	0.116476	-0.0755611	0.617605	0.810723	0.0936073	0.482039
ABHD16A	-0.33002	-0.0755611	0.47546	0.810723	-0.0616029	0.482039
FAM167A	0.470348	-0.0755611	0.336958	0.810723	0.253127	0.482039
FBXL6	0.493341	-0.0755611	0.207017	0.810723	0.109819	0.482039
MIR4523	0.102514	-0.0755611	0.153207	0.810723	0.119527	0.482039
SBDS	0.0311746	-0.0755611	-0.133342	0.810723	0.475521	0.482039
ZNF530	0.400993	-0.119067	-0.00826523	0.810598	0.17771	0.05271
DLEU2L	-0.251499	0.197025	0.577133	0.80968	-0.129954	0.384512
TMEM120A	-0.292185	0.111103	0.695425	0.809375	0.528307	0.550605
UPP2	-0.258299	0.00657031	0.38554	0.80933	-0.178341	0.258316
CYP27A1	-0.0649165	-0.087189	0.102634	0.80747	0.459287	0.127808
TGS1	-0.359671	0.332724	0.151511	0.807082	0.660317	0.606211
PRDM10	-0.0155205	-0.162499	0.64686	0.80647	0.41205	0.451929
JTB	0.367589	0.217174	-0.362871	0.805397	0.0526828	0.487816
ZBTB33	0.127798	0.00172477	-0.393855	0.805245	0.382851	0.131901
RNF149	-0.0885771	0.369005	0.520731	0.804275	0.495389	0.758888
PTDSS1	-0.270233	0.154472	0.139817	0.802909	-0.0215669	0.50898
ZBTB6	-0.427268	0.154472	0.105682	0.802909	0.785439	0.50898
CSRP1	-0.360603	0.154472	-0.396844	0.802909	0.405906	0.50898
JUNB	-0.147339	0.353588	0.595871	0.801192	0.650415	0.723312
CBX5	-0.295425	0.283547	0.696242	0.799219	0.825922	0.696593
SP140L	-0.362067	0.325046	0.818343	0.799185	0.733034	0.706662
NAMPT	0.225547	-0.0824152	0.796568	0.799144	0.530789	0.130368
PLK1S1	0.0347456	0.206097	0.389285	0.798907	-0.221506	0.332863
MECOM	-0.0932143	0.249677	0.655707	0.798489	0.359494	0.56176
LOC100271836	0.280051	0.0524844	0.0243637	0.797917	0.294995	0.396548
ZNF18	0.62503	-0.115918	-0.525955	0.797714	-0.597678	0.263054
DBN1	-0.346293	0.245216	0.223741	0.797483	0.340907	0.462174
GSTT1	-0.774412	-0.5035	0.35526	0.797294	0.331599	-0.107253
TSPAN16	-0.458081	0.0547106	0.302387	0.797263	0.936318	0.530483
CEBPA	-0.256209	0.320128	-0.253521	0.797227	0.328049	0.489047
EBF1	0.0988101	-0.122287	-0.261005	0.796752	-0.239186	0.369175
FCGR1A	-0.295774	-0.143502	0.648311	0.79644	0.511698	0.438854
SGK1	-0.0602311	-0.476993	0.410911	0.795484	0.481722	0.010962
ZNF800	0.287173	0.0995754	-0.592271	0.795	-0.144584	0.494357
RHBDF2	-0.354282	-0.0870677	-0.294706	0.794993	0.513097	0.387798
IRF2BP2	-0.511116	0.209349	0.473324	0.794627	0.713757	0.645492
C1orf122	0.304261	0.170452	0.0750015	0.794347	0.0674157	0.607024
RIPK3	-0.340839	0.0563531	0.601619	0.793667	0.0127415	0.196697
S100A3	-0.0747826	0.0563531	-0.171975	0.793667	-0.353016	0.196697
ARNT	0.331949	0.0432041	0.171458	0.793238	0.139198	0.477672
TRIM8	-0.27595	0.11657	-0.189979	0.793201	0.612116	0.345885
TTLL4	0.234977	-0.497507	0.309376	0.792027	0.268933	-0.181313
INO80B	-0.479956	0.193891	0.412673	0.791821	0.734073	0.652569
MIR215	0.0575132	0.301533	0.229062	0.79142	-0.360683	0.528405
C19orf59	-0.385486	-0.114708	0.69117	0.791164	0.0723022	0.182415
MECR	0.518239	-0.252387	0.40896	0.790391	0.0614216	0.201156
IFRD2	-0.356235	0.140075	0.851704	0.788854	0.534103	0.311536
ANGPTL5	-0.540902	0.140075	0.76373	0.788854	0.486572	0.311536
POMC	-0.540902	0.140075	0.76373	0.788854	0.486572	0.311536
ZNF579	0.116476	0.140075	0.617605	0.788854	0.0936073	0.311536
ABHD10	-0.741934	0.140075	0.434468	0.788854	0.0990606	0.311536
DGKK	-0.367369	0.140075	0.398339	0.788854	0.624331	0.311536
LOC645949	-0.367369	0.140075	0.398339	0.788854	0.624331	0.311536
PSMD13	-0.367369	0.140075	0.398339	0.788854	0.624331	0.311536
ZNF133	-0.367369	0.140075	0.398339	0.788854	0.624331	0.311536
HIST1H1A	0.0347456	0.140075	0.389285	0.788854	-0.221506	0.311536
CHCHD7	0.455092	0.140075	0.275125	0.788854	0.175166	0.311536
ARMCX2	0.493341	0.140075	0.207017	0.788854	0.109819	0.311536
TNS1	0.493341	0.140075	0.207017	0.788854	0.109819	0.311536
ZNF503	0.493341	0.140075	0.207017	0.788854	0.109819	0.311536
CASP9	-0.520496	0.140075	0.189997	0.788854	0.786236	0.311536
GPRC5C	0.670961	0.140075	0.183283	0.788854	-0.050152	0.311536
ATP6V0B	-0.548926	0.140075	0.181514	0.788854	-0.366088	0.311536
PTH1R	0.102514	0.140075	0.153207	0.788854	0.119527	0.311536
SLC15A4	-0.160283	0.140075	0.14244	0.788854	0.778807	0.311536
C3orf43	0.671861	0.140075	0.0879032	0.788854	-0.147362	0.311536
NUDT8	0.0944454	0.140075	0.0719208	0.788854	-0.354966	0.311536
BRI3BP	0.348389	0.140075	0.00153162	0.788854	-0.524317	0.311536
RPL23AP7	0.0741828	0.140075	-0.0833368	0.788854	0.112143	0.311536
RPSAP52	0.386331	0.140075	-0.0919243	0.788854	-0.302761	0.311536
IFNW1	0.0881898	0.140075	-0.119868	0.788854	-0.291943	0.311536
NFIL3	-0.51728	0.140075	-0.187866	0.788854	0.682443	0.311536
CRYAA	-0.161864	0.140075	-0.206768	0.788854	-0.0402045	0.311536
CLDN24	0.433062	0.140075	-0.270559	0.788854	-0.273407	0.311536
MGP	0.433062	0.140075	-0.270559	0.788854	-0.273407	0.311536
PRPSAP2	-0.360603	0.140075	-0.396844	0.788854	0.405906	0.311536
BBS7	0.470818	0.140075	-0.405314	0.788854	-0.370311	0.311536
SPIN1	0.407989	0.140075	-0.476333	0.788854	0.0261122	0.311536
C9orf50	0.464497	0.140075	-0.507452	0.788854	-0.477501	0.311536
LYPD2	0.464497	0.140075	-0.507452	0.788854	-0.477501	0.311536
COPS2	0.0793504	0.140075	-0.690668	0.788854	-0.0546815	0.311536
PLCL1	-0.417932	0.140075	-0.251699	0.788854	0.442595	0.311536
DHRS4	-0.0934229	0.404631	0.440446	0.788637	0.783473	0.802214
MAPK7	0.522519	-0.0160497	-0.745949	0.788589	-0.605087	0.189705
HMOX1	0.652303	0.181864	-0.512729	0.78811	-0.304071	0.516006
UBE2Q2	0.305575	0.23717	0.533364	0.787787	0.301533	0.691937
C1orf162	-0.360603	0.220676	-0.396844	0.787427	0.405906	0.622056
HIST4H4	0.600138	0.283185	-0.385041	0.786143	-0.127145	0.771225
RPSAP9	0.0741828	-0.219938	-0.0833368	0.785989	0.112143	-0.107124
LOC100130476	-0.0499909	-0.558191	0.341091	0.784925	0.4222	-0.186826
MIR3178	0.455092	-0.263466	0.275125	0.784852	0.175166	0.339219
LOC643837	-0.529475	-0.0873991	0.405834	0.783819	0.792136	0.371666
PPCDC	-0.389106	-0.412353	0.437722	0.783819	0.76261	0.167455
IER3	-0.342687	-0.554455	0.437359	0.783688	0.624723	-0.21541
TTF1	0.50407	-0.378077	-0.15844	0.7816	-0.154322	0.304537
ADAM6	0.102514	-0.326633	0.153207	0.781442	0.119527	-0.0988016
GPR31	-0.511104	-0.326633	0.664458	0.781442	0.599408	-0.0988016
HSD17B4	0.116476	-0.326633	0.617605	0.781442	0.0936073	-0.0988016
LRRC42	0.116476	-0.326633	0.617605	0.781442	0.0936073	-0.0988016
BRMS1L	-0.340839	-0.326633	0.601619	0.781442	0.0127415	-0.0988016
ITGAD	-0.340839	-0.326633	0.601619	0.781442	0.0127415	-0.0988016
METTL4	-0.340839	-0.326633	0.601619	0.781442	0.0127415	-0.0988016
NUF2	-0.340839	-0.326633	0.601619	0.781442	0.0127415	-0.0988016
RPS4Y1	-0.340839	-0.326633	0.601619	0.781442	0.0127415	-0.0988016
RRP9	-0.340839	-0.326633	0.601619	0.781442	0.0127415	-0.0988016
SPIN2B	-0.340839	-0.326633	0.601619	0.781442	0.0127415	-0.0988016
ZNF71	-0.340839	-0.326633	0.601619	0.781442	0.0127415	-0.0988016
DOCK4	-0.0649559	-0.326633	0.541091	0.781442	0.691276	-0.0988016
LOC100506274	0.0962133	-0.326633	0.462348	0.781442	0.560717	-0.0988016
NEU4	0.154812	-0.326633	0.426441	0.781442	0.455175	-0.0988016
KRTAP4-4	-0.503489	-0.326633	0.398817	0.781442	-0.221715	-0.0988016
CREG2	-0.367369	-0.326633	0.398339	0.781442	0.624331	-0.0988016
MERTK	-0.367369	-0.326633	0.398339	0.781442	0.624331	-0.0988016
MIR1304	-0.367369	-0.326633	0.398339	0.781442	0.624331	-0.0988016
PCYOX1L	-0.367369	-0.326633	0.398339	0.781442	0.624331	-0.0988016
SERPINA9	-0.367369	-0.326633	0.398339	0.781442	0.624331	-0.0988016
MRPL18	0.0347456	-0.326633	0.389285	0.781442	-0.221506	-0.0988016
HECTD3	0.45091	-0.326633	0.344265	0.781442	0.156116	-0.0988016
ABCB7	-0.142159	-0.326633	0.281307	0.781442	0.361012	-0.0988016
S100A13	-0.142159	-0.326633	0.281307	0.781442	0.361012	-0.0988016
CLEC11A	0.455092	-0.326633	0.275125	0.781442	0.175166	-0.0988016
MN1	-0.239087	-0.326633	0.260835	0.781442	0.610968	-0.0988016
C10orf88	0.493341	-0.326633	0.207017	0.781442	0.109819	-0.0988016
GPR101	0.493341	-0.326633	0.207017	0.781442	0.109819	-0.0988016
HDHD3	0.493341	-0.326633	0.207017	0.781442	0.109819	-0.0988016
HSD11B1L	0.493341	-0.326633	0.207017	0.781442	0.109819	-0.0988016
IFI44	0.493341	-0.326633	0.207017	0.781442	0.109819	-0.0988016
PTPLA	0.493341	-0.326633	0.207017	0.781442	0.109819	-0.0988016
TBPL2	0.493341	-0.326633	0.207017	0.781442	0.109819	-0.0988016
GNG11	0.493341	-0.326633	0.207017	0.781442	0.109819	-0.0988016
CTSL1	0.421491	-0.326633	0.205747	0.781442	-0.242471	-0.0988016
C12orf4	-0.548926	-0.326633	0.181514	0.781442	-0.366088	-0.0988016
TAF12	-0.535735	-0.326633	0.156399	0.781442	0.319748	-0.0988016
CDC42EP5	0.102514	-0.326633	0.153207	0.781442	0.119527	-0.0988016
FAM189B	0.102514	-0.326633	0.153207	0.781442	0.119527	-0.0988016
MAP7	0.102514	-0.326633	0.153207	0.781442	0.119527	-0.0988016
RPE65	0.102514	-0.326633	0.153207	0.781442	0.119527	-0.0988016
POLB	-0.160283	-0.326633	0.14244	0.781442	0.778807	-0.0988016
TIMM17A	0.671861	-0.326633	0.0879032	0.781442	-0.147362	-0.0988016
ABCC5	-0.233384	-0.326633	-0.0617752	0.781442	0.496961	-0.0988016
SCUBE2	0.386331	-0.326633	-0.0919243	0.781442	-0.302761	-0.0988016
SNORD95	0.386331	-0.326633	-0.0919243	0.781442	-0.302761	-0.0988016
CNIH4	0.323031	-0.326633	-0.121641	0.781442	-0.384799	-0.0988016
FOLR3	0.101381	-0.326633	-0.144983	0.781442	0.393892	-0.0988016
ZNF212	0.101381	-0.326633	-0.144983	0.781442	0.393892	-0.0988016
MIR4272	0.731561	-0.326633	-0.229461	0.781442	-0.280822	-0.0988016
TACO1	-0.755436	-0.326633	-0.247611	0.781442	0.367643	-0.0988016
GTF2F2	-0.377874	-0.326633	-0.363961	0.781442	-0.492063	-0.0988016
LOC100506895	-0.377874	-0.326633	-0.363961	0.781442	-0.492063	-0.0988016
MIR130A	-0.377874	-0.326633	-0.363961	0.781442	-0.492063	-0.0988016
TMSB4Y	-0.377874	-0.326633	-0.363961	0.781442	-0.492063	-0.0988016
GAS1	0.847099	-0.326633	-0.382733	0.781442	-0.55986	-0.0988016
C7orf26	-0.360603	-0.326633	-0.396844	0.781442	0.405906	-0.0988016
CD9	-0.360603	-0.326633	-0.396844	0.781442	0.405906	-0.0988016
GPR119	-0.360603	-0.326633	-0.396844	0.781442	0.405906	-0.0988016
LOC100289650	-0.360603	-0.326633	-0.396844	0.781442	0.405906	-0.0988016
MAP4K3	-0.360603	-0.326633	-0.396844	0.781442	0.405906	-0.0988016
OLFM1	-0.360603	-0.326633	-0.396844	0.781442	0.405906	-0.0988016
PALM	-0.360603	-0.326633	-0.396844	0.781442	0.405906	-0.0988016
PPME1	-0.360603	-0.326633	-0.396844	0.781442	0.405906	-0.0988016
RQCD1	-0.360603	-0.326633	-0.396844	0.781442	0.405906	-0.0988016
SNORD18C	-0.360603	-0.326633	-0.396844	0.781442	0.405906	-0.0988016
TTC5	-0.360603	-0.326633	-0.396844	0.781442	0.405906	-0.0988016
UQCRC2	-0.360603	-0.326633	-0.396844	0.781442	0.405906	-0.0988016
ZGLP1	-0.360603	-0.326633	-0.396844	0.781442	0.405906	-0.0988016
SLC27A2	0.741934	-0.326633	-0.434468	0.781442	-0.0990606	-0.0988016
ANKDD1B	0.464497	-0.326633	-0.507452	0.781442	-0.477501	-0.0988016
APH1B	0.464497	-0.326633	-0.507452	0.781442	-0.477501	-0.0988016
ARHGEF10	0.464497	-0.326633	-0.507452	0.781442	-0.477501	-0.0988016
FANK1	0.464497	-0.326633	-0.507452	0.781442	-0.477501	-0.0988016
VIT	0.464497	-0.326633	-0.507452	0.781442	-0.477501	-0.0988016
OXSR1	-0.0721177	-0.326633	-0.536897	0.781442	0.212264	-0.0988016
MIR4754	0.0661594	-0.326633	-0.665552	0.781442	-0.740517	-0.0988016
CELSR2	0.493341	-0.326633	0.207017	0.781442	0.109819	-0.0988016
SNORA68	0.493341	-0.326633	0.207017	0.781442	0.109819	-0.0988016
SPACA4	-0.360603	-0.326633	-0.396844	0.781442	0.405906	-0.0988016
STXBP3	-0.730136	-0.411468	0.412005	0.77801	0.712491	0.267229
CYCSP52	-0.648515	-0.350616	0.447664	0.777213	0.795836	0.0793023
LRRC23	-0.182023	-0.356427	0.576508	0.776985	0.101022	0.0993158
C19orf77	0.463634	0.131591	0.249435	0.776681	0.104856	0.598285
RNF144B	0.119377	0.237687	-0.164285	0.776514	-0.256532	0.698252
AKAP11	-0.174632	-0.0419661	-0.102066	0.776269	-0.0930781	0.519899
ZNF763	-0.309339	0.0757119	0.156817	0.775299	0.502163	0.43892
PSEN1	-0.354114	0.267883	0.720118	0.774727	0.804967	0.735277
BCL2L13	-0.729476	0.348004	-0.00492549	0.774331	0.67488	0.572222
GINS3	-0.163597	0.193836	0.259314	0.773906	0.0789142	0.696403
OR7E24	-0.335566	0.185372	0.281818	0.773281	0.299357	0.265518
ICK	-0.522406	-0.015012	0.431746	0.773079	0.430921	0.43531
REXO4	0.048404	0.156968	0.587261	0.772684	0.699899	0.368492
MARK4	-0.56289	0.0116461	0.669316	0.772491	0.405776	0.316237
FSIP1	-0.105224	-0.283171	0.264169	0.772035	0.439983	-0.0722281
PPP2R5E	0.393521	0.300525	0.385531	0.771457	0.098431	0.469758
ADI1	-0.00963006	0.290965	0.0124372	0.770813	0.461227	0.58756
RGS19	-0.128405	0.141552	0.0300033	0.770608	0.498985	0.302231
RBPJ	-0.165385	0.104659	0.3494	0.770574	0.505682	0.575689
CD300LF	0.297508	0.346995	0.00816811	0.76997	0.297253	0.639548
ZCCHC18	-0.51644	0.326773	0.523799	0.768498	0.174708	0.638727
GRIN1	0.330266	-0.388283	-0.137335	0.768248	-0.106521	-0.184783
CABYR	0.319027	0.0522655	-0.472775	0.768096	0.0836082	0.584094
GKAP1	0.279486	-0.507556	-0.19639	0.767215	-0.447754	-0.153833
DLG3	0.671861	0.25145	0.0879032	0.767124	-0.147362	0.566411
RNASE7	0.490163	0.25145	-0.409471	0.767124	-0.39701	0.566411
S100A1	-0.476567	0.380422	-0.135993	0.766819	0.531465	0.681583
TGFBI	0.133409	0.0385273	0.289421	0.766513	0.298531	0.261109
BBC3	-0.543756	0.0746586	0.666926	0.765942	0.581455	0.446679
PIK3AP1	-0.615012	0.165971	0.468633	0.764391	0.821842	0.416283
OAS2	-0.483745	-0.217098	0.263971	0.764131	0.753676	0.360595
PPP1R1A	-0.710367	0.0601192	0.450175	0.764091	0.736185	0.5276
LRRC41	0.407312	-0.0729055	0.125804	0.76377	0.284964	0.468849
BSG	-0.239341	0.458745	0.212058	0.763192	0.365852	0.743519
LILRA5	-0.407993	0.0439156	0.790919	0.762126	0.825688	0.265444
ZDHHC8	-0.321933	-0.189177	0.00221636	0.76099	0.512814	0.415123
DAK	-0.161177	0.304089	0.295425	0.760723	0.0102863	0.603536
SLC36A4	-0.271516	-0.238894	0.438459	0.76064	0.619894	0.10632
PDZD4	0.219455	0.113779	0.0365789	0.760121	-0.240743	0.332946
COX10	-0.295633	-0.146105	-0.296412	0.759819	-0.677654	0.201015
CSMD1	-0.139153	-0.148511	0.32189	0.758771	0.450724	0.361115
SCARF1	-0.0545668	0.245327	0.593585	0.758308	0.558612	0.707332
ALG8	0.780888	0.125867	-0.10596	0.75778	-0.409366	0.316279
UMODL1	-0.620828	-0.054585	0.155449	0.757702	0.509658	0.143451
ACOT8	-0.258293	-0.0473605	-0.387882	0.757119	0.0785037	0.571259
C11orf85	-0.360603	-0.612936	-0.396844	0.757004	0.405906	-0.060733
CLIP4	-0.39206	0.255075	0.557601	0.756481	0.168554	0.509246
NRARP	-0.229011	-0.135919	-0.352338	0.755978	0.419987	-0.0231388
HIST1H3A	0.406807	-0.183586	-0.13702	0.755689	-0.214534	0.327101
TBX21	-0.101108	0.0699667	-0.452848	0.755277	0.116469	0.526951
ADC	-0.47404	-0.304454	0.305568	0.754383	0.785004	-0.0852788
RNU6ATAC	-0.228752	0.119067	-0.277918	0.753816	0.451083	0.607499
MIR4484	-0.360603	0.0144064	-0.396844	0.753561	0.405906	0.361745
COX17	-0.419463	-0.294871	0.426958	0.753239	0.924951	0.364846
ARHGAP24	-0.340839	-0.222363	0.601619	0.753162	0.0127415	-0.0358596
MRPL4	-0.495282	0.0868065	0.383191	0.752124	0.204992	0.116773
SLC39A8	-0.351512	-0.20538	0.0787008	0.751932	0.192397	0.0950359
PIP4K2B	-0.274017	-0.286274	0.712351	0.751736	0.683735	0.192151
LARP4B	0.160396	0.240928	0.601546	0.75007	0.156335	0.732672
SLC9A7P1	-0.33761	-0.0714574	0.518378	0.750039	0.573912	0.187112
DENND3	-0.408536	0.293255	-0.0289764	0.749948	0.634278	0.778197
LOC286059	-0.573823	0.363112	0.405601	0.749725	0.791292	0.751122
ING2	-0.443628	-0.294524	0.686476	0.749696	0.127147	0.145156
SDF2L1	0.386331	-0.294524	-0.0919243	0.749696	-0.302761	0.145156
MYLPF	0.277719	0.0231538	0.411293	0.749152	0.171302	0.303115
SAMD4B	0.341105	0.221978	0.303187	0.749096	0.515293	0.537965
GLTPD2	-0.236782	0.324398	0.0519867	0.748923	0.741046	0.529659
RAB9A	-0.496174	-0.117094	0.589672	0.748315	0.0186516	0.00634506
RGL1	0.295665	-0.570526	-0.252107	0.748315	0.14929	-0.144123
DGKG	0.116476	0.231839	0.617605	0.748125	0.0936073	0.3222
PFDN2	-0.360603	0.231839	-0.396844	0.748125	0.405906	0.3222
ZNF500	0.0926038	-0.0216398	0.616592	0.747167	-0.0783219	0.333422
SLC22A7	-0.21564	0.326171	0.612495	0.746591	0.277026	0.524782
RFXAP	0.493341	-0.494756	0.207017	0.746292	0.109819	-0.0227379
CRIP2	0.0547195	0.223086	0.28934	0.746089	0.412456	0.419369
ATP2B3	-0.712304	0.0104314	0.189657	0.745431	0.716397	0.326043
DDX20	0.418279	0.0985733	-0.190069	0.745318	-0.349785	0.37514
TNPO2	0.00683088	-0.122481	0.177011	0.745124	0.677915	0.0470006
MGAT1	0.188945	0.378799	0.57712	0.744656	0.160855	0.635269
TMEM121	-0.126267	-0.0846519	0.366475	0.744396	0.645185	0.25449
ARPC1A	-0.387938	0.224741	0.0365802	0.744372	0.496029	0.389966
MED23	-0.182023	0.414494	0.576508	0.74418	0.101022	0.677532
MGC21881	0.527951	-0.213632	-0.259335	0.744138	-0.0438487	0.349196
COL28A1	0.0793504	-0.413224	-0.690668	0.744102	-0.0546815	-0.162298
DNAH2	0.270579	-0.487662	0.107763	0.743738	-0.296173	-0.23008
FTH1	-0.3147	0.464308	0.560054	0.742915	0.624245	0.797457
TRUB2	-0.106187	0.179931	0.385138	0.742699	0.19129	0.613774
IARS2	0.179617	0.311285	-0.496028	0.740991	-0.313591	0.620122
LCP2	-0.526783	0.192847	0.404367	0.740363	0.430414	0.273997
UBR3	0.116476	0.374444	0.617605	0.740337	0.0936073	0.627041
LOC100216545	-0.387462	0.348454	0.716132	0.740085	0.691985	0.806068
CDK7	-0.183004	0.171078	0.5958	0.739842	-0.0537116	0.298295
SPESP1	-0.0814498	-0.0270256	-0.205488	0.739411	0.155001	0.575984
P4HA1	0.297508	-0.398901	0.00816811	0.739267	0.297253	-0.0190791
FLOT1	-0.264422	0.0650484	-0.265119	0.739266	0.386815	0.327007
TTC21A	-0.624102	0.0476808	0.457238	0.739065	0.861528	0.469846
CLIC3	0.14517	0.248868	-0.220329	0.739054	-0.00741444	0.48977
RNF19A	-0.506051	0.25547	0.455829	0.738944	0.644692	0.280045
NKRF	0.587266	-0.33893	-0.0227623	0.738207	-0.333203	0.205446
FBXL17	0.417452	0.443027	-0.129719	0.737918	0.00528727	0.644341
RABEPK	0.136676	0.392878	0.573725	0.737722	0.0346872	0.688919
CCDC58	0.16116	0.214808	-0.447115	0.737712	0.267845	0.568861
CCR8	-0.259907	-0.140115	0.845892	0.737097	0.355286	0.372466
HLA-DRB5	0.248764	-0.426773	0.0135976	0.735897	0.156497	0.111766
TCEA2	-0.556529	0.341493	0.39006	0.734872	0.044359	0.608608
RASL11A	-0.455108	0.404634	0.725649	0.734845	0.645872	0.549435
GPHA2	-0.533766	0.339265	0.188838	0.734803	0.0561675	0.657067
RNF113A	0.16095	0.496346	-0.282609	0.734428	0.0872811	0.730076
RAC3	0.126355	0.0107422	0.573282	0.734421	0.00438876	0.217934
PASK	-0.237434	-0.2738	0.281752	0.734033	-0.0273031	-0.109118
C19orf10	-0.357878	0.161484	0.521478	0.733051	-0.131352	0.242421
STEAP3	-0.240107	0.313548	0.7248	0.733047	0.585617	0.621751
NUDT1	-0.39662	0.0606964	0.592196	0.732936	0.269675	0.689757
POLG2	0.012247	0.293281	0.170073	0.732872	-0.201673	0.656366
ATP6V0D1	-0.146781	-0.502354	0.82452	0.73283	0.510224	-0.214614
RNF126P1	-0.540902	-0.502354	0.76373	0.73283	0.486572	-0.214614
SNORD47	-0.114709	-0.502354	0.476946	0.73283	0.645538	-0.214614
LAMB3	-0.400794	-0.502354	0.385729	0.73283	0.572097	-0.214614
MAP2K7	0.392219	0.234512	0.372542	0.73283	0.469272	0.550611
KRT2	0.493341	-0.502354	0.207017	0.73283	0.109819	-0.214614
ZNF484	-0.504674	-0.502354	-0.0912697	0.73283	0.391821	-0.214614
KCNIP3	0.386331	-0.502354	-0.0919243	0.73283	-0.302761	-0.214614
RFPL2	0.386331	-0.502354	-0.0919243	0.73283	-0.302761	-0.214614
PIGV	0.0196506	-0.502354	-0.373303	0.73283	0.0787784	-0.214614
OSBPL11	-0.276029	0.11642	-0.585485	0.73008	0.224993	0.339861
DUSP22	0.150871	0.237178	0.503622	0.729961	0.373793	0.632719
TOR1A	-0.0637873	0.114534	-0.303393	0.729598	0.101013	0.720151
MORF4L2	-0.013343	0.316011	0.525684	0.729511	0.712135	0.745891
LOC729444	-0.633561	0.317635	0.0446183	0.729385	0.259936	0.700555
PYGO2	0.51893	0.366308	0.215082	0.728438	0.0313523	0.694689
SLC4A7	0.434966	0.195906	0.351232	0.728079	0.301212	0.368545
ZNF614	0.150262	0.195906	0.241395	0.728079	-0.0904037	0.368545
NFKB2	-0.279419	-0.0159283	0.901418	0.727965	0.489887	0.566845
C8orf49	-0.368412	0.341715	0.67603	0.727777	0.317652	0.43011
FADD	0.142799	-0.189523	0.699261	0.727419	-0.0227769	-0.0742003
DVL2	-0.405133	0.123065	-0.10282	0.727066	0.428608	0.62679
CDH3	-0.304262	-0.578039	0.647568	0.727019	0.0521714	-0.319972
PELO	0.366816	0.363097	0.130765	0.726811	0.26656	0.665191
MIR25	0.368514	-0.0297291	0.689921	0.726071	0.335964	0.296853
C1orf216	0.348389	0.0950946	0.00153162	0.725836	-0.524317	0.470441
BPGM	-0.322515	0.0871184	0.860564	0.725384	0.464708	0.346222
TARSL2	-0.0456515	0.354518	0.466308	0.725149	-0.282841	0.643149
WRAP53	-0.0353395	0.422458	0.0932115	0.725137	0.392933	0.857129
MRPS24	-0.511104	0.370786	0.664458	0.724947	0.599408	0.470285
ACSBG2	0.0222369	0.0676309	0.0341916	0.724235	-0.399553	0.434271
KIAA0146	-0.386665	0.322323	0.58217	0.722945	0.34159	0.714223
MASTL	0.0378068	0.262801	0.747211	0.722868	0.35281	0.596049
NCF1	-0.362941	-0.173455	0.107909	0.721397	0.520309	0.236198
FNDC8	-0.319754	0.426181	0.49973	0.719719	0.300941	0.704115
PLEKHH3	0.0661594	0.399774	-0.665552	0.719533	-0.740517	0.585591
KIFC3	-0.574119	0.173443	0.414061	0.719516	0.281608	0.230615
FLRT1	-0.298101	0.502603	0.453199	0.718226	0.00682999	0.679701
GYS1	-0.185061	0.437533	0.367833	0.716909	0.240943	0.704545
APLP2	-0.436512	0.310121	0.275774	0.716908	0.474397	0.635678
LEPROTL1	0.560485	0.432484	0.0947527	0.716871	0.191849	0.839589
CREM	0.451216	0.272382	0.202063	0.716673	-0.164971	0.370362
TSHB	0.139141	-0.393626	-0.241639	0.716651	-0.543417	-0.185768
GAA	-0.422116	0.0630702	-0.0881879	0.716033	0.565698	0.422529
GCHFR	-0.520571	0.395314	0.497846	0.715979	0.49272	0.53518
TRAFD1	0.166321	0.282442	0.696353	0.715758	0.228597	0.694054
CRADD	-0.340839	0.148147	0.601619	0.715675	0.0127415	0.62231
KLHDC10	-0.340839	0.148147	0.601619	0.715675	0.0127415	0.62231
SPAG16	-0.340839	0.148147	0.601619	0.715675	0.0127415	0.62231
GALNT3	-0.256742	0.148147	0.473979	0.715675	0.253127	0.62231
TEAD1	-0.367369	0.148147	0.398339	0.715675	0.624331	0.62231
KLRC3	-0.360603	0.148147	-0.396844	0.715675	0.405906	0.62231
TEKT4P2	-0.360603	0.148147	-0.396844	0.715675	0.405906	0.62231
IDH1	-0.187164	0.148147	-0.866384	0.715675	-0.385052	0.62231
YIPF2	-0.120126	0.463634	0.131526	0.715207	0.0109737	0.640873
TMEM50A	0.129162	-0.102504	0.422247	0.714793	-0.160049	0.195488
POLR2F	0.0347456	-0.102504	0.389285	0.714793	-0.221506	0.195488
ATP6AP1	-0.340839	0.388132	0.601619	0.714331	0.0127415	0.461405
CCR1	-0.377302	0.388132	0.391029	0.714331	0.53749	0.461405
RIOK1	-0.103202	0.388132	0.330631	0.714331	-0.214795	0.461405
DRAM2	0.237506	0.388132	0.171975	0.714331	0.0647007	0.461405
SNHG6	-0.210309	0.388132	-0.160966	0.714331	-0.284529	0.461405
ZNF600	-0.340839	-0.161567	0.601619	0.713818	0.0127415	0
PGBD2	0.493341	-0.161567	0.207017	0.713818	0.109819	0
VWC2L	-0.36504	-0.161567	-0.0655553	0.713818	-0.0384931	0
LOC727924	-0.210309	-0.161567	-0.160966	0.713818	-0.284529	0
LOC100128770	-0.620668	0.404625	0.214327	0.713119	0.615643	0.661138
GTSE1	-0.332021	0.454737	0.0365268	0.712829	0.581458	0.541587
MAP1LC3B2	-0.00258471	-0.473992	0.195536	0.712504	0.162062	0.0541469
COLQ	0.470348	-0.445072	0.336958	0.711762	0.253127	0.0115014
NT5DC2	-0.143418	0.482697	-0.0597804	0.711738	0.558542	0.837717
SNX6	0.594298	-0.0294472	-0.241395	0.711591	-0.0127415	0.50758
C1orf177	-0.377874	-0.0294472	-0.363961	0.711591	-0.492063	0.50758
PKMYT1	-0.315022	0.39645	-0.385176	0.711484	0.374244	0.775395
DHRS9	0.0567311	0.229499	0.34521	0.711326	0.388709	0.780556
S1PR1	0.351466	0.134052	0.0148813	0.711137	-0.250109	0.478383
C19orf70	-0.639622	0.0824522	0.530337	0.710845	0.184867	0.424298
FAM98C	-0.542866	0.410351	0.13288	0.710789	0.780278	0.803564
MCM9	-0.459654	0.317429	0.243809	0.710672	-0.0843414	0.796792
NHEG1	0.101381	0.0112601	-0.144983	0.710341	0.393892	0.185645
FGF17	-0.256329	-0.34936	0.949108	0.709779	0.401318	-0.0951914
ETNK2	0.0489668	0.331127	-0.0992699	0.709779	-0.367772	0.561242
ARL2	-0.114616	0.488506	0.226789	0.709399	0.680252	0.831564
FLYWCH1	-0.180991	0.431163	-0.0536563	0.708877	0.50482	0.625376
OBFC1	0.323089	0.105602	-0.658084	0.708611	-0.869164	0.182438
RNF5	-0.530403	-0.192872	0.450117	0.708395	0.121486	-0.160565
BRSK1	-0.267156	0.352156	-0.270879	0.708244	0.480327	0.581791
NKG7	-0.145953	0.0249897	0.488969	0.70798	0.284274	0.36692
MID1IP1	0.045719	0.427888	0.109756	0.707942	0.0465391	0.694408
RHOB	-0.00556095	0.350343	0.422618	0.707755	0.291884	0.69563
ODF2	-0.0878517	0.452249	0.657904	0.707747	0.594421	0.656597
GOLGA7	-0.504674	0.276266	-0.0912697	0.707706	0.391821	0.554037
SLBP	-0.0660177	0.170922	0.531558	0.706246	0.398763	0.217607
GTF2IRD2P1	-0.551817	0.326654	0.0889789	0.705235	0.759294	0.548566
KCTD19	-0.210524	0.302381	0.691394	0.704833	-0.0550523	0.760907
AQP6	-0.547377	0.321363	0.341591	0.704553	0.140052	0.687823
LTBR	0.724358	-0.0710286	-0.100576	0.704307	-0.169522	0.288214
ULK3	-0.256742	-0.112767	0.473979	0.704296	0.253127	0.0275794
SAT1	-0.340898	0.167279	0.428233	0.704009	0.842756	0.404483
FAM102A	-0.230723	0.357767	0.442817	0.703888	-0.036053	0.594344
UTY	-0.265764	0.0965526	0.251217	0.703742	0.323564	0.520811
PIGX	0.455052	0.330668	0.0981088	0.70373	-0.00325863	0.815771
MTOR	-0.498878	0.404656	0.432199	0.703603	0.648422	0.657151
LAP3	-0.146211	0.226356	0.742983	0.703597	0.473692	0.596546
PDIK1L	0.316313	0.226356	-0.462586	0.703597	-0.137007	0.596546
MAPK8	-0.112975	0.159025	-0.472685	0.702731	0.311669	0.326156
PGD	0.017489	0.397221	-0.0375689	0.702596	0.418976	0.480304
APOBEC3H	-0.0219121	0.289197	-0.32525	0.702382	0.203656	0.755206
CYB5RL	-0.611449	0.141084	0.686121	0.702053	0.618718	0.369391
COTL1	0.0311395	0.248173	-0.0214027	0.701891	0.493947	0.544509
TCF7L2	-0.440045	0.145976	0.637231	0.701443	0.638245	0.364319
C21orf37	-0.160708	0.113665	0.0250164	0.701021	-0.43396	0.55746
LANCL1	-0.730136	0.140591	0.412005	0.700474	0.712491	0.210827
LOC100499484	-0.0558171	0.412083	0.658761	0.700258	-0.047989	0.675055
SEPHS1	-0.313185	-0.191408	0.0597029	0.699973	0.475565	0.0864046
TALDO1	-0.204247	0.507892	0.387774	0.699746	0.464367	0.664279
LOC100128682	-0.231963	0.487256	0.475745	0.699632	0.202894	0.768081
PSD	0.0841454	0.314198	0.358652	0.699412	0.297377	0.638917
ZBTB1	-0.368394	0.36101	0.561723	0.698789	0.168787	0.665768
PDZD11	0.0670553	0.248746	0.522968	0.698004	0.608016	0.781894
CYP2B6	-0.0677911	0.408857	0.0536334	0.69788	0.263834	0.758713
LSMD1	0.0597116	0.292294	0.293167	0.697061	0.454401	0.826151
GPR87	-0.360969	0.0668224	0.2788	0.69674	-0.0947111	0.574036
UBE2D3	-0.616651	0.538241	0.831892	0.695566	0.653312	0.839545
NRM	-0.422938	0.465188	0.188493	0.69537	0.581459	0.818817
MED29	-0.263469	0.488042	0.889219	0.69501	0.633654	0.832107
TMED2	-0.0285651	0.455529	0.313816	0.694512	0.133615	0.751556
LYPLA2	-0.467483	0.295597	0.310056	0.694273	-0.252476	0.776466
SIRPB1	0.328534	0.392846	-0.159894	0.694174	0.111816	0.704237
LRP8	-0.391757	0.392846	-0.398952	0.694174	0.332423	0.704237
LOC100272217	-0.145795	-0.509403	0.602366	0.693897	0.530535	0.171275
BRE	0.23674	-0.497534	0.561954	0.693892	0.298699	0.0403364
EMR3	-0.30134	-0.254522	0.727916	0.693379	0.595069	0.268525
RNF175	-0.550541	0.501049	-0.077763	0.693361	0.522434	0.824029
FNIP2	0.102514	-0.321901	0.153207	0.69334	0.119527	-0.0167874
HIPK1	0.290089	0.291109	0.281863	0.693328	0.138526	0.37605
WTAP	-0.128537	0.47927	0.441711	0.691953	0.378951	0.640162
ICAM1	-0.000113959	0.268456	0.223127	0.691684	0.318724	0.66814
LOC606724	0.496729	0.347534	0.111612	0.69099	-0.250333	0.610127
LOC392196	-0.565093	-0.2443	-0.375795	0.690949	0.351308	0.198078
ZFC3H1	-0.166493	-0.088841	0.687891	0.690852	0.548802	0.417761
CYP2A6	-0.230533	-0.161749	0.203812	0.690705	0.359604	0.387709
MAP4K5	-0.108279	-0.215044	-0.278781	0.690664	0.437951	0.140849
AURKAIP1	0.407989	0.394956	-0.476333	0.690661	0.0261122	0.515534
NDUFA4L2	-0.0254857	0.358429	0.496836	0.69062	0.0413671	0.757299
RAB4A	-0.114709	0.358429	0.476946	0.69062	0.645538	0.757299
ALG14	-0.509311	0.358429	0.404807	0.69062	0.62679	0.757299
DOHH	-0.22706	0.358429	0.0995551	0.69062	-0.534264	0.757299
PRRG2	-0.668546	0.358429	0.0964736	0.69062	0.677654	0.757299
FUT3	0.822592	0.358429	-0.14349	0.69062	-0.222689	0.757299
MIR219-1	-0.00494098	0.358429	-0.204027	0.69062	-0.132875	0.757299
NEURL4	0.747562	0.402279	-0.254577	0.690365	-0.0256416	0.671715
TMEM187	0.102514	0.261008	0.153207	0.689736	0.119527	0.393666
ATP2A1	-0.291307	0.467939	0.702024	0.688742	0.353569	0.680655
B4GALT1	-0.293306	0.485534	0.857731	0.688364	0.731306	0.880114
PTGDS	-0.535735	-0.096319	0.156399	0.688258	0.319748	0.448265
PHF15	0.0967572	0.39873	0.857912	0.687041	0.2697	0.647712
ZBTB8OS	0.246697	0.435919	0.105403	0.686961	0.431019	0.801607
MYL5	-0.14122	0.41835	-0.432199	0.685811	0.21345	0.547498
SH3GL1P1	-0.153958	0.373861	0.303771	0.685785	-0.252418	0.41884
DENND4B	0.0054249	0.439911	-0.275453	0.684963	0.144298	0.821078
SCO2	-0.592767	0.443904	0.190565	0.684549	0.499171	0.836144
TTYH3	-0.790535	0.400548	0.365692	0.684029	0.158484	0.752582
LENEP	-0.533695	0.169465	-0.156615	0.683937	-0.170971	0.342549
GPA33	-0.360603	0.169465	-0.396844	0.683937	0.405906	0.342549
PNPLA5	-0.360603	0.169465	-0.396844	0.683937	0.405906	0.342549
KIAA1257	-0.159129	0.169465	-0.420835	0.683937	0.241897	0.342549
TRIM37	-0.265986	-0.354061	0.00699084	0.683283	0.437013	0.241722
TMEM170A	-0.161058	-0.354061	-0.779782	0.683283	-0.0696039	0.241722
GALC	-0.45895	0.398087	0.40507	0.683244	0.624207	0.567731
C1orf213	0.679686	0.188648	-0.461344	0.683152	-0.500675	0.309041
EMP3	-0.108714	0.181577	-0.319238	0.682905	0.360927	0.450119
ZNF596	-0.182023	0.0744743	0.576508	0.682794	0.101022	0.208043
NDUFA1	0.493415	0.0744743	-0.191549	0.682794	-0.103294	0.208043
LY6E	0.152102	-0.259692	0.462611	0.682556	0.479928	0.239856
DLEU1	-0.338123	0.371442	0.627545	0.681144	0.796581	0.711021
JDP2	-0.373268	0.268181	-0.200288	0.680437	0.48412	0.609914
TAB2	0.268829	0.258947	0.405536	0.679398	-0.00189314	0.772845
OR52I2	0.348389	-0.135233	0.00153162	0.679264	-0.524317	0.360607
NADSYN1	-0.0155205	0.0163037	0.64686	0.678985	0.41205	0.220627
ITGB3	0.0988101	0.309895	-0.261005	0.678417	-0.239186	0.587977
IL1B	0.0829845	-0.638485	0.313981	0.677804	0.301327	-0.313783
THEMIS	-0.305188	0.244494	0.512604	0.677304	0.530278	0.825475
MIR155HG	-0.331512	0.428233	0.462038	0.677133	0.000828959	0.679997
GNRH1	-0.676807	0.459009	-0.131385	0.677116	0.509731	0.765872
MAPK3	-0.281793	0.133115	0.309074	0.676826	0.23208	0.492417
CCNL1	-0.509656	0.512283	0.469677	0.675721	0.643901	0.852949
MIR4461	-0.153371	0.485215	0.11155	0.675267	-0.0302702	0.601289
HSPA6	-0.536882	0.36236	-0.332137	0.674923	0.200241	0.376889
USH2A	-0.449491	0.374139	0.0726848	0.674557	-0.238773	0.557338
PTGIR	0.301487	0.0594101	0.0250905	0.674259	0.0192301	0.610392
ADAM15	0.397645	0.272232	0.311985	0.674165	-0.0195025	0.522428
HNRNPF	-0.236617	0.510397	0.549364	0.674036	0.192651	0.802197
ELMO1	0.113785	0.567608	-0.100594	0.673779	-0.377754	0.732854
NLRP3	-0.381825	0.341774	0.558461	0.673364	0.939291	0.738719
SHC4	0.44653	-0.227309	-0.703278	0.67287	-0.39842	-0.0966599
VSIG10	-0.159997	0.436164	0.0144602	0.672662	-0.069895	0.822294
IL23A	-0.0234049	-0.120015	-0.0225183	0.672439	0.111171	0.386851
SYDE1	0.290595	0.00787151	0.392315	0.672288	0.120584	0.191075
ADPGK	-0.39967	0.578055	0.904072	0.672069	0.347534	0.758382
PFKFB3	0.135441	0.380704	0.515822	0.671904	0.469231	0.710821
ADAM8	-0.327259	0.347726	0.0840508	0.671873	0.548817	0.855792
SNUPN	-0.253402	0.516686	0.183135	0.671066	0.30389	0.782775
GPSM3	-0.475648	0.171609	0.750456	0.671008	0.729442	0.68214
RNF220	0.0941699	0.44525	0.582956	0.670891	0.675848	0.750368
RIC8A	0.0793838	0.474183	-0.437806	0.670323	0.41997	0.723615
C11orf95	-0.252483	0.517726	-0.478475	0.668726	0.0338823	0.840993
SLC8A1	0.215687	0.389147	0.0954707	0.668668	0.204338	0.675245
LOC285501	0.428354	0.32571	0.328832	0.668507	0.214002	0.584387
CD2	0.367693	0.415982	0.0712836	0.668213	-0.580674	0.62764
LITAF	-0.49268	0.507116	0.516098	0.66796	0.245086	0.643884
TCEAL8	0.517576	0.457013	0.269547	0.667272	0.161168	0.495821
A1BG-AS1	-0.543494	0.356611	-0.0129173	0.666794	0.290889	0.610184
SNORD22	0.671861	0.359199	0.0879032	0.666633	-0.147362	0.29913
ZNF594	0.336853	0.136721	0.115162	0.666281	-0.0936148	0.6607
VILL	0.029883	-0.631034	0.526104	0.666181	0.528689	-0.268935
HSPA1L	-0.259907	-0.426459	0.845892	0.665565	0.355286	0.151707
KRTAP10-2	-0.340839	-0.426459	0.601619	0.665565	0.0127415	0.151707
LOC286114	-0.172081	-0.426459	0.164904	0.665565	0.165377	0.151707
FBXO4	-0.270233	-0.426459	0.139817	0.665565	-0.0215669	0.151707
OR11H6	0.529803	-0.426459	0.0372892	0.665565	0.210182	0.151707
SNCA	0.342562	-0.4715	-0.286594	0.665365	-0.202686	-0.213212
EPB41L3	-0.469307	0.143454	0.619	0.665349	0.368179	0.517467
ATAD2B	-0.463821	0.385438	0.619928	0.665285	0.629703	0.85225
NCOA6	-0.0279989	0.38695	0.48279	0.664967	0.273031	0.687153
NPEPPS	-0.764261	0.279646	0.440855	0.664798	0.482867	0.635504
TRMT6	-0.619405	0.0868679	-0.0372125	0.663603	0.493023	0.518012
EIF5A	0.226604	0.306252	0.598243	0.663575	0.0938339	0.795948
ABHD12B	-0.688977	0.369101	0.085398	0.662671	0.564668	0.784491
WEE1	0.0661594	0.168441	-0.665552	0.662041	-0.740517	0.690711
C17orf102	-0.0536303	9.74724e-05	0.39708	0.661804	-0.155509	0.246192
LOC152225	-0.446789	-0.448423	0.328373	0.661803	0.530486	0.0254368
LOC100128822	0.340769	-0.448423	0.0796956	0.661803	0.348476	0.0254368
PYGM	0.424824	0.314844	0.29885	0.661726	-0.139209	0.592678
TUT1	-0.270111	0.478185	0.308415	0.661205	0.113585	0.567
INO80E	-0.0433411	0.440524	0.61829	0.660951	0.134067	0.700637
BTLA	0.0855388	0.0339666	0.475312	0.660847	-0.152114	0.663997
PPTC7	0.805242	0.23068	-0.0355182	0.660729	-0.0432531	0.365123
OGFOD2	0.0429257	0.265103	0.226148	0.660542	0.645126	0.572637
ARSF	0.251057	0.402851	-0.0216632	0.660376	-0.61613	0.746151
NPFF	-0.336479	0.0258037	-0.360154	0.660183	0.437747	0.420113
NSRP1	-0.0547759	0.466787	0.0671429	0.659985	0.19161	0.685197
PSMA1	-0.299181	0.351011	0.636633	0.659868	0.770402	0.366605
ZNF559	-0.62848	0.598676	0.627668	0.659488	0.34027	0.742764
KCNH7	-0.63716	0.551076	0.0330604	0.659422	0.61194	0.760156
CHN2	0.386331	0.129399	-0.0919243	0.659389	-0.302761	0.275737
ZNF606	-0.440309	0.363022	0.785751	0.659031	0.10981	0.515595
CD1A	-0.540902	0.324913	0.76373	0.658908	0.486572	0.4005
GATA1	0.583286	0.324913	0.0879032	0.658908	0.00957698	0.4005
OLFML2B	0.0944454	0.324913	0.0719208	0.658908	-0.354966	0.4005
ADCY4	-0.326481	-0.0416838	0.0476977	0.658893	0.168833	0.484059
TMEM132D	-0.507465	-0.568538	0.516835	0.658639	0.272589	0.00750757
VKORC1	-0.618779	-0.291773	0.441799	0.657529	0.388949	-0.238614
RASL11B	0.23788	0.412996	-0.325113	0.657452	-0.291826	0.670911
TCF19	0.10059	0.245214	-0.520309	0.657437	-0.184506	0.29435
FAM43A	-0.499685	0.22082	0.243562	0.656934	0.552128	0.72071
IFT88	0.0209025	-0.106063	-0.0852882	0.656366	0.198642	0.33525
TIMP1	0.493341	-0.614745	0.207017	0.655808	0.109819	-0.186506
OPN3	-0.63352	0.351763	0.42751	0.655738	0.270254	0.620802
ETV6	0.342812	0.112294	0.485156	0.655463	0.492545	0.207437
WARS	-0.19638	0.17907	0.777566	0.655286	0.626837	0.395116
TRIM61	-0.257816	0.0379369	0.299414	0.655286	0.217104	0.194145
RPS6KA4	0.199987	0.417637	-0.456655	0.655244	0.0910777	0.68013
UBE2K	0.0926038	0.0727603	0.616592	0.654924	-0.0783219	0.566878
ALCAM	-0.186412	0.288719	0.385168	0.65491	0.484076	0.85542
MPEG1	0.720361	0.28182	-0.0564404	0.654844	-0.0426055	0.654498
GPR88	-0.108118	-0.138768	-0.211001	0.654746	0.328524	0.34353
TK2	0.0806241	-0.191307	0.697212	0.654271	0.0876643	0.399692
MTA1	-0.271305	0.288664	0.353638	0.653516	0.206323	0.438922
PCOLCE	-0.712614	-0.132804	-0.363961	0.653312	0.394581	-0.171691
CETP	-0.425167	0.202367	0.608855	0.653251	-0.00164883	0.274783
PAN3	-0.126269	0.497295	0.163707	0.652922	0.778066	0.629864
EDC3	-0.0951589	0.525138	0.629831	0.652817	0.170833	0.879704
OIP5	-0.208128	0.546297	0.311005	0.652648	-0.083749	0.70561
ZSWIM5	0.356327	0.146048	-0.0281594	0.651826	0.253563	0.208056
CCNK	0.197236	0.329149	0.280125	0.651537	0.375648	0.631424
NACC1	-0.684943	0.409138	0.0837934	0.651258	0.396858	0.658221
CCT8L2	-0.10426	0.363511	-0.495413	0.65109	0.0602579	0.340714
KLHL25	-0.14891	0.477194	0.00255269	0.650932	0.17947	0.643739
CLTA	0.0238917	0.254218	-0.327173	0.650637	0.213522	0.62197
PNMA5	0.184258	-0.116709	0.366854	0.650297	0.360106	0.267498
ARV1	0.361515	0.490599	0.454928	0.650209	0.0481487	0.599859
KIAA0513	-0.423183	0.369885	0.748017	0.649846	0.607513	0.863275
TMEM126B	-0.535735	0.224408	0.156399	0.649801	0.319748	0.676086
FAM76B	0.102514	0.224408	0.153207	0.649801	0.119527	0.676086
KHK	-0.340839	-0.223941	0.601619	0.64963	0.0127415	0.0203494
PGAP3	0.0944454	-0.223941	0.0719208	0.64963	-0.354966	0.0203494
MAPRE3	-0.168262	0.469264	0.432749	0.649591	-0.221039	0.645886
PTPN3	-0.111383	0.143508	0.486562	0.649214	0.114645	0.486513
VSIG4	-0.0323531	0.300952	-0.173864	0.648291	0.513735	0.781287
NPC1L1	-0.193868	0.292044	0.543887	0.64797	0.22475	0.595221
SNRPA1	0.342562	0.141845	-0.286594	0.64789	-0.202686	0.654918
C14orf23	0.473577	0.248294	0.422306	0.647814	0.0460311	0.640127
SLC2A4RG	0.0632553	0.401514	0.0707423	0.647255	0.175885	0.732442
PHC2	0.111366	0.264949	-0.515784	0.647237	0.137571	0.519629
SP3	-0.109613	0.536401	-0.0889838	0.646868	0.378712	0.818421
VAV3	-0.283518	0.356262	0.644243	0.646685	0.181963	0.712148
ARHGEF33	-0.607564	0.548378	0.455901	0.64587	0.396135	0.680981
MNDA	-0.149916	0.403339	0.296915	0.645733	0.251946	0.743393
C16orf72	-0.537688	0.607973	-0.122554	0.645704	0.350794	0.843825
ALDH9A1	0.0115161	0.310387	0.447695	0.64529	-0.171567	0.503565
SCNN1D	-0.535735	0.600212	0.156399	0.644586	0.319748	0.817233
C1QBP	-0.132844	0.557951	0.68032	0.644378	0.1604	0.702631
ECI1	-0.479333	0.241686	-0.22409	0.644344	0.325508	0.566668
ANKRD37	-0.298612	0.56635	0.39026	0.644316	0.199702	0.66677
ANKRD20A5P	0.144637	0.348446	0.277951	0.643294	0.180553	0.609348
WDR77	-0.314591	0.420306	0.426223	0.643277	0.183782	0.595267
EHBP1L1	-0.154716	0.45062	0.254928	0.642448	0.655554	0.828496
TSC22D1	-0.41097	0.598062	-0.119367	0.641602	0.177621	0.832561
BRAP	-0.30318	0.479466	-0.561262	0.641526	-0.67287	0.563974
ABCG8	-0.265986	-0.244662	0.00699084	0.641372	0.437013	0.120392
LSG1	-0.0889205	0.506846	0.646805	0.641138	0.00546063	0.76008
VAPA	-0.279224	0.501721	0.335479	0.641079	0.136928	0.768063
CNR2	-0.340839	-0.00681509	0.601619	0.640628	0.0127415	0.0865768
CAMK2N1	0.0962133	-0.00681509	0.462348	0.640628	0.560717	0.0865768
ALDH18A1	0.493341	-0.00681509	0.207017	0.640628	0.109819	0.0865768
PPA1	0.493341	-0.00681509	0.207017	0.640628	0.109819	0.0865768
COQ7	0.102514	-0.00681509	0.153207	0.640628	0.119527	0.0865768
KIAA0040	0.368094	0.469462	0.489607	0.640202	-0.1231	0.589249
LOC641367	0.181847	0.270708	0.140583	0.640049	0.0740708	0.544555
HIC1	0.259183	0.345555	-0.0629271	0.639948	0.184812	0.715479
VN1R1	-0.422158	0.534522	0.11698	0.639891	0.388204	0.615571
OR10G2	-0.270327	0.261046	0.355502	0.639101	-0.254339	0.486226
C19orf67	-0.480205	0.527974	0.425056	0.638863	0.553302	0.776106
FAS-AS1	-0.250009	0.542348	0.630574	0.638824	0.80536	0.76985
EIF1AY	-0.737312	-0.620715	-0.108745	0.638563	-0.050152	-0.41886
NDST3	-0.304465	0.19708	0.536982	0.638322	0.260194	0.763677
SNAPC4	-0.253554	0.460016	-0.211957	0.638048	0.563806	0.516625
LOC100652772	0.254091	0.497229	-0.191718	0.637914	-0.178407	0.904752
PQBP1	-0.192199	0.481087	0.570301	0.637834	0.43962	0.778686
FAM86HP	0.0863397	-0.0330312	-0.37582	0.637667	-0.291615	-0.0391189
ZNF628	-0.146781	0.00894368	0.82452	0.637456	0.510224	0.320504
PPP1R3F	-0.0894955	0.00894368	0.67014	0.637456	0.0642944	0.320504
ACN9	0.147562	0.00894368	0.604608	0.637456	-0.0103145	0.320504
C10orf2	-0.340839	0.00894368	0.601619	0.637456	0.0127415	0.320504
SNORD56B	0.050885	0.00894368	0.474411	0.637456	0.31935	0.320504
COL23A1	0.129841	0.00894368	-0.00664908	0.637456	0.189959	0.320504
RPRD2	0.20027	0.335772	0.142366	0.637444	0.681438	0.447864
ANKK1	-0.254022	0.58782	0.374875	0.634912	0.198348	0.775452
ZXDA	-0.0901888	-0.310109	0.591425	0.634293	-0.0737815	0.118495
MBNL1	0.0228089	0.519948	0.37437	0.634012	0.740488	0.829409
SENP1	0.116476	0.362002	0.617605	0.633509	0.0936073	0.6833
OPTN	0.348947	0.526382	0.502423	0.632741	-0.0131578	0.512353
RBM38	0.357107	0.591372	-0.299908	0.632484	-0.00584207	0.902172
CPSF4	-0.197613	0.44413	0.475426	0.632076	-0.285213	0.562218
HLA-DPA1	0.258226	0.238706	0.241089	0.631664	0.40631	0.763953
PRX	-0.345511	0.24301	0.510145	0.631582	-0.175376	0.412429
GCSH	-0.393851	-0.219212	-0.387157	0.6314	-0.147685	0.259257
GRPEL1	-0.243061	0.55043	0.708291	0.631244	0.620124	0.687185
REEP4	0.31591	0.51736	0.628234	0.631187	0.263232	0.807635
SEMA6B	-0.0824428	0.51736	0.269205	0.631187	0.24754	0.807635
RAD54L2	0.152424	0.51736	0.248482	0.631187	-0.351771	0.807635
SLC39A3	0.0793504	0.51736	-0.690668	0.631187	-0.0546815	0.807635
SLC2A6	0.15887	0.302683	0.422769	0.63092	0.407171	0.814103
PAX8	0.107894	0.0801426	-0.0363566	0.630721	0.0625115	0.622659
ALS2CR12	-0.673474	0.220138	-0.40874	0.630705	0.186344	0.37746
ETFB	-0.555997	0.468166	0.0011416	0.630641	0.786857	0.801165
RFC2	-0.187729	0.558617	0.447179	0.630154	0.371201	0.823117
LOC100505676	0.261896	0.461485	0.228648	0.629966	0.0393238	0.890498
SCAMP2	-0.220194	0.452078	-0.075715	0.629866	0.0227484	0.6419
CALU	-0.120943	0.524702	0.687438	0.629761	0.217726	0.859281
SLC35A2	-0.527915	0.405972	0.0322295	0.629069	0.567866	0.71195
CD63	0.2528	0.591607	0.380389	0.62887	-0.247474	0.726588
GPR137	-0.0972956	0.461399	0.22953	0.628732	0.34413	0.723289
KCNQ1	-0.0513471	0.316287	-0.465798	0.628713	-0.0503429	0.596952
GINS2	-0.130131	0.200345	-0.142475	0.628663	0.170091	0.341672
OCIAD2	-0.306207	-0.00400685	0.300186	0.628297	-0.0111235	-0.00729638
TMEM216	-0.10093	-0.00978445	0.868038	0.628217	0.23437	-0.0465056
ENPP1	-0.335071	0.0874253	-0.186959	0.627822	0.508647	0.517728
PRDM14	-0.612501	-0.048791	0.239069	0.627787	0.128262	0.523346
POLR2J2	-0.504674	0.402363	-0.0912697	0.627606	0.391821	0.730254
SRGN	0.37675	0.134571	0.40436	0.62757	0.113172	0.558167
NAT8B	-0.215261	0.00646578	0.0770914	0.627496	0.0791656	-0.0152621
MAML3	0.126433	0.473687	-0.192568	0.627322	0.235414	0.802401
ERI1	0.281693	0.124302	0.0960653	0.62727	0.555974	0.346084
CEBPB	-0.24858	0.492647	0.111679	0.627053	0.377634	0.772667
VAT1	-0.277632	0.54281	0.22542	0.626941	0.0133052	0.870044
RCOR2	-0.544414	0.587682	0.33355	0.626629	0.616909	0.724038
LGALS9	0.493341	-0.0990589	0.207017	0.626151	0.109819	0.29136
NXF1	-0.275297	0.481778	-0.0574261	0.625645	0.0691057	0.84527
CCR10	0.713183	-0.114332	-0.306199	0.625282	-0.339395	0.00508736
C5orf64	-0.363183	0.547203	0.460716	0.625234	0.0647124	0.865161
GPS2	-0.00902052	0.537334	0.59317	0.625042	0.343321	0.794447
PKDREJ	-0.451189	0.508229	0.0750806	0.624913	0.503062	0.669485
C19orf33	0.265359	-0.17564	-0.0043263	0.62468	0.155712	-0.0833922
RRN3	-0.114709	0.181739	0.476946	0.624176	0.645538	0.547739
CERS6	0.368094	0.320491	0.489607	0.623375	-0.1231	0.353589
KCNN4	0.0829845	0.320491	0.313981	0.623375	0.301327	0.353589
MAPRE1	0.355979	0.320491	0.212223	0.623375	0.323344	0.353589
RAB11FIP3	-0.502065	0.526765	0.720305	0.62287	0.471472	0.803237
FHL2	-0.346314	0.445048	0.422005	0.622859	0.528872	0.856322
TAZ	0.075797	0.256056	0.086735	0.622836	0.703403	0.426657
DNAJC25	-0.103829	0.451616	0.597056	0.622798	0.128826	0.885278
FOSB	0.073482	0.145344	0.571863	0.622589	0.159943	0.52015
MIA	0.095214	0.341533	0.172638	0.622314	-0.282132	0.725602
LPAR5	0.294807	0.419127	-0.205883	0.622117	-0.303665	0.814886
ERRFI1	0.628471	0.375784	0.339046	0.621911	0.107	0.419516
CCDC157	-0.179088	0.520546	-0.0170991	0.621451	0.136003	0.871062
ZFAND1	0.133409	0.0947528	0.289421	0.621279	0.298531	0.611744
GNG5	0.712192	0.626977	0.0288662	0.621153	0.121411	0.761045
ZNF639	-0.0263303	0.223552	-0.087089	0.62077	0.467715	0.713756
LMO7	-0.166486	0.423846	0.336445	0.620712	0.109008	0.43645
ESPNP	0.102514	-0.11109	0.153207	0.620543	0.119527	0.401313
GXYLT1	0.337248	0.478325	0.0919243	0.620305	-0.626354	0.747804
CES4A	0.0944454	-0.339723	0.0719208	0.619946	-0.354966	0.142239
FAM74A1	0.257251	0.0931906	-0.592703	0.619356	-0.705972	0.338101
LOC100507032	-0.310393	0.536722	0.726569	0.619072	0.874388	0.880005
FLJ33534	0.446522	0.359598	-0.16717	0.619068	-0.636699	0.802844
S100P	-0.497725	0.209655	0.669028	0.618998	0.772678	0.14749
FPGS	0.263035	-0.0222236	0.13243	0.618974	0.436191	0.594688
ANXA9	-0.471987	0.479169	0.32834	0.618795	0.670446	0.773963
GNA15	0.0195631	-0.188	0.348572	0.618742	0.00632017	0.369539
PRR7	-0.678575	0.360195	0.415109	0.618666	0.439656	0.669286
POMT1	-0.303572	0.528659	0.747239	0.618407	0.599208	0.925021
ELP3	-0.424509	0.466885	0.651442	0.618287	0.49337	0.679034
YY1	-0.330594	0.490437	0.224057	0.618064	0.127917	0.876147
NOSTRIN	-0.0873862	0.0111028	0.239254	0.617578	0.833137	0.228718
SMC2	0.0196506	0.0111028	-0.373303	0.617578	0.0787784	0.228718
MBD1	0.0355846	0.470954	0.294361	0.617237	0.0222342	0.736246
COPS3	-0.30579	0.316746	0.40496	0.616982	0.122098	0.525694
BIN3	-0.109002	0.503471	0.48231	0.616518	0.683581	0.902719
FAM89B	-0.197469	0.356672	-0.131808	0.616504	0.518649	0.784015
ZEB2	-0.0271331	0.445796	0.614059	0.615979	0.559343	0.696276
IDH3B	0.17875	0.359199	0.179349	0.615943	-0.185771	0.520167
VMAC	-0.0744328	0.225167	0.531583	0.615541	0.252446	0.533744
ITPKB	-0.252453	0.534147	0.630834	0.615366	0.312	0.684523
PLXDC2	0.404286	0.047899	0.122031	0.615318	-0.057432	0.506727
RPA2	-0.593649	0.611839	0.134924	0.614783	0.656694	0.847222
STX2	0.219534	0.624523	0.0843268	0.614524	-0.162059	0.782767
CCR5	-0.680338	-0.0936658	0.0574605	0.614494	-0.0985502	0.480357
SRP14	-0.338143	0.565568	0.36826	0.614418	0.630787	0.789881
JHDM1D	0.245183	0.0273042	0.0393115	0.614042	0.116469	0.54839
KDM1A	-0.511167	0.484754	0.245492	0.614001	0.341286	0.778175
RCBTB2	-0.186062	0.354985	0.101564	0.613924	-0.0897797	0.496201
C9orf16	-0.120141	0.312017	-0.141997	0.613911	0.354941	0.570755
CLDN15	0.110309	0.0324487	-0.589169	0.613489	0.0717906	0.465982
NDUFAF3	0.250988	0.609935	0.269553	0.612257	-0.383558	0.79102
LAS1L	0.560662	-0.168387	0.0675902	0.611384	-0.0894908	0.117138
MANF	-0.131979	0.0714006	0.195213	0.611249	0.69325	0.330248
HIST1H2BF	0.477827	0.215772	-0.0767349	0.611247	-0.697079	0.713586
FDFT1	-0.425565	0.459066	0.0366443	0.610994	0.516889	0.745462
C9orf72	0.39206	-0.264188	-0.557601	0.610607	-0.168554	0.216106
GBF1	0.150946	0.52519	0.551429	0.610594	0.185622	0.597906
C9orf40	-0.1208	0.492513	0.132912	0.610517	0.635274	0.488553
CCDC144A	-0.367369	0.329514	0.398339	0.61027	0.624331	0.434607
TMEM176A	0.014483	0.329514	0.234028	0.61027	0.245603	0.434607
SMS	0.563731	0.329514	0.217698	0.61027	0.230941	0.434607
EXT1	0.493341	0.329514	0.207017	0.61027	0.109819	0.434607
TPPP3	-0.377874	0.329514	-0.363961	0.61027	-0.492063	0.434607
LSM2	0.464497	0.329514	-0.507452	0.61027	-0.477501	0.434607
PLD2	-0.108279	0.298094	-0.278781	0.610252	0.437951	0.607136
MYOF	-0.146781	0.349998	0.82452	0.609938	0.510224	0.787148
SPI1	0.0243337	0.529113	-0.122729	0.609846	0.21623	0.699434
TRIM46	-0.404538	0.0819481	-0.193128	0.609724	0.490623	0.449221
ODF3L1	0.386331	-0.37723	-0.0919243	0.609707	-0.302761	-0.103806
PPM1F	-0.0267602	0.399415	0.560739	0.609301	0.671156	0.83035
REC8	-0.24896	0.48377	0.203202	0.609239	0.648103	0.888453
NSUN2	-0.442927	0.247233	0.300329	0.609146	0.453232	0.570705
HMGXB3	-0.560075	0.531744	-0.154155	0.608975	-0.0121012	0.887495
LDLRAP1	0.527837	0.40157	-0.123198	0.608944	0.127071	0.645511
FOS	0.151102	0.54953	0.631632	0.608812	0.265764	0.792295
FAM160B2	-0.411137	0.454959	0.28483	0.60869	0.252118	0.701924
ZNF75A	0.279486	0.325995	-0.19639	0.608263	-0.447754	0.473862
RASGEF1B	-0.540902	-0.223911	0.76373	0.608131	0.486572	0.308767
LOC100616530	-0.511104	-0.223911	0.664458	0.608131	0.599408	0.308767
TEAD3	0.036426	0.500021	0.621233	0.608131	0.0931136	0.764428
PPP2R5B	-0.340839	-0.223911	0.601619	0.608131	0.0127415	0.308767
CXCL2	-0.229059	-0.223911	0.59272	0.608131	0.13868	0.308767
LOC731779	-0.367369	-0.223911	0.398339	0.608131	0.624331	0.308767
RHBDD3	-0.367369	-0.223911	0.398339	0.608131	0.624331	0.308767
SNORA52	0.0347456	-0.223911	0.389285	0.608131	-0.221506	0.308767
MYBBP1A	-0.484686	0.539641	0.358213	0.608131	0.464886	0.734187
NPHP4	-0.472429	-0.223911	0.274041	0.608131	0.409771	0.308767
ACAD10	0.014483	-0.223911	0.234028	0.608131	0.245603	0.308767
SPIB	0.102514	-0.223911	0.153207	0.608131	0.119527	0.308767
APBA1	0.0944454	-0.223911	0.0719208	0.608131	-0.354966	0.308767
FAM20C	0.358783	-0.223911	0.000949868	0.608131	0.130324	0.308767
LOC285629	0.386331	-0.223911	-0.0919243	0.608131	-0.302761	0.308767
MYT1	0.386331	-0.223911	-0.0919243	0.608131	-0.302761	0.308767
GCA	0.101381	-0.223911	-0.144983	0.608131	0.393892	0.308767
ZDHHC4	-0.173662	-0.223911	-0.184304	0.608131	-0.653634	0.308767
CLCA4	-0.197118	-0.223911	-0.186081	0.608131	0.401306	0.308767
SLC22A15	0.0196506	-0.223911	-0.373303	0.608131	0.0787784	0.308767
IL31	-0.360603	-0.223911	-0.396844	0.608131	0.405906	0.308767
MIR4266	-0.360603	-0.223911	-0.396844	0.608131	0.405906	0.308767
ZNF718	-0.360603	-0.223911	-0.396844	0.608131	0.405906	0.308767
ADH1B	0.464497	-0.223911	-0.507452	0.608131	-0.477501	0.308767
DTX2P1-UPK3BP1-PMS2P11	0.464497	-0.223911	-0.507452	0.608131	-0.477501	0.308767
ZNF775	0.464497	-0.223911	-0.507452	0.608131	-0.477501	0.308767
TMEM91	-0.0230604	0.509652	0.428228	0.608003	-0.0386411	0.916123
GATA3	-0.103271	-0.421842	0.506705	0.607773	0.385277	0.138025
FAM129B	0.0558998	0.30836	0.324772	0.607633	0.116093	0.675426
IFNB1	-0.340839	0.339976	0.601619	0.607575	0.0127415	0.663053
RAP2A	0.456226	0.339976	0.366456	0.607575	0.139499	0.663053
SPINT1	-0.293996	0.339976	-0.304351	0.607575	0.442564	0.663053
SNORD127	0.0945192	0.339976	-0.48097	0.607575	-0.63225	0.663053
OSCAR	0.285585	0.329756	-0.105445	0.607074	-0.162731	0.836773
RHOA	0.534436	0.179531	0.267403	0.606969	0.281647	0.713685
HLTF	-0.566038	0.605112	0.260395	0.606658	0.381204	0.81131
HSBP1L1	0.109625	0.470863	-0.0741952	0.606491	-0.178652	0.740936
ZBTB2	-0.282997	-0.279805	0.302522	0.605908	-0.0404677	0.168329
DDX11L10	0.323031	0.568179	-0.121641	0.605869	-0.384799	0.586464
MKI67IP	0.102572	0.427414	-0.206163	0.60479	0.583597	0.407546
MICAL2	0.758759	0.47153	-0.22147	0.604241	-0.352186	0.642528
MT1JP	0.0699671	0.340581	-0.302524	0.602684	0.0954609	0.782033
MTF1	-0.197509	0.534091	0.744652	0.601926	0.724637	0.831777
CD93	-0.676011	0.492496	0.421452	0.601091	0.820223	0.661307
LOC100652768	-0.329235	0.472461	0.0967501	0.601037	0.459437	0.668181
EEF2K	0.315548	0.42936	0.310012	0.600375	0.435977	0.709674
BCL7B	-0.233089	0.637707	0.563857	0.600349	0.491647	0.768997
GPRC5D	-0.408894	-0.27637	0.650415	0.600207	0.224483	0.0474224
CIR1	-0.499108	0.609566	0.79107	0.600105	0.39219	0.861641
SECTM1	-0.43916	0.122552	-0.341153	0.599982	0.28264	0.625082
F8	-0.503489	-0.314184	0.398817	0.59978	-0.221715	0.123648
CUL5	0.272662	0.597466	-0.277268	0.599612	-0.123653	0.754163
PANX1	0.504593	0.069803	-0.25686	0.599227	0.187215	0.530195
CCDC101	-0.154563	0.580509	0.304747	0.599095	0.16732	0.80762
SV2C	0.0319905	0.591598	0.0477943	0.598875	0.313398	0.622473
TIMP2	-0.143266	0.0517039	-0.374825	0.598875	0.364234	0.443313
IL1RL1	-0.521469	0.172184	-0.388873	0.598817	-0.121957	0.337116
NUB1	-0.613608	0.360613	0.220036	0.598664	0.349079	0.762449
CERS2	-0.423615	0.436621	0.310307	0.598565	-0.0451594	0.438793
HBQ1	-0.161864	0.132522	-0.206768	0.59853	-0.0402045	0.659499
EIF2AK2	0.0972251	0.359802	-0.0425413	0.598346	0.0429607	0.765192
MIS12	-0.368165	0.618333	0.636642	0.597915	0.31339	0.79662
TMEM138	-0.113183	0.534755	0.114052	0.596812	0.262276	0.903481
TDRD3	-0.102266	0.467176	0.438327	0.596038	0.0419424	0.540833
TNFRSF17	-0.116855	0.317208	0.677263	0.595862	0.582243	0.415122
MACROD1	0.0734204	0.53634	0.0901965	0.5958	-0.369718	0.587792
DKFZP434I0714	0.137203	-0.118875	-0.256061	0.595502	0.221528	0.171336
TULP2	-0.272227	-0.673695	0.488385	0.595322	0.619171	-0.326788
PAQR8	-0.0917514	0.358079	0.535019	0.595321	-0.0433183	0.694411
PER3	-0.410468	0.305667	0.419547	0.595281	-0.22333	0.720351
ALDH1A3	-0.296119	0.608164	0.132045	0.594854	0.4495	0.871625
HSPH1	0.189933	0.380327	-0.64585	0.594766	-0.526319	0.476466
NDE1	0.223814	0.537071	0.611299	0.594618	0.597221	0.624021
RBCK1	-0.786424	0.344168	0.330192	0.594513	0.390491	0.391837
LOC100505795	-0.367369	-0.106272	0.398339	0.594442	0.624331	0.107124
PHLDA2	-0.279477	-0.106272	-0.327171	0.594442	0.162319	0.107124
C1QTNF9B	-0.360603	-0.106272	-0.396844	0.594442	0.405906	0.107124
KRTAP4-6	-0.587106	-0.144242	-0.0791874	0.594138	-0.313722	0.0762302
TBXAS1	-0.378178	-0.00452634	-0.320696	0.594004	0.0672772	0.248493
PYCARD	0.366384	0.57477	-0.411782	0.593841	0.142138	0.545802
RILPL2	0.353007	0.5778	-0.224702	0.593834	-0.248699	0.795569
EXD1	-0.0723208	0.60314	0.540619	0.593812	0.0474956	0.824692
LONRF2	-0.411793	0.559714	0.534313	0.593611	0.0187388	0.79657
TUBB8	-0.360603	-0.221464	-0.396844	0.593262	0.405906	-0.158559
OR51Q1	0.334888	-0.38694	-0.680548	0.593188	-0.255734	-0.337462
KCNN3	-0.418858	0.654183	0.536314	0.593034	0.581234	0.800593
SAMD12	-0.0197639	0.319454	0.197301	0.592947	0.458086	0.615165
G6PC3	-0.711839	0.654842	-0.013957	0.592858	-0.0219261	0.753584
SRRM5	-0.135856	0.588397	0.237274	0.592153	0.27426	0.767633
PSMA6	-0.821369	-0.753823	0.420701	0.592135	0.40181	-0.144649
ZNF586	0.0605064	0.565572	-0.117569	0.592065	-0.0220407	0.734197
CDK6	0.0715565	0.400759	0.127165	0.5918	0.200893	0.272004
FAM131B	-0.0854766	0.249228	0.453507	0.591717	-0.313399	0.593977
EXOC5	-0.554153	-0.569427	0.447062	0.591677	0.218154	-0.265881
SLAMF1	0.316445	-0.0367809	0.545567	0.591653	0.481748	0.112409
GIMAP6	0.113354	0.563187	-0.560006	0.591211	-0.227765	0.606423
CDKN1B	-0.228804	0.608909	0.152694	0.591128	0.45644	0.844588
C21orf67	-0.668467	0.566912	0.261592	0.591109	0.757376	0.898056
RADIL	0.382933	0.199525	0.192473	0.590826	0.0542968	0.74824
WDR5	0.261704	0.155214	-0.0548355	0.59037	-0.116818	0.19851
ATP4A	0.578107	0.476642	0.329604	0.590194	0.301519	0.742692
RTEL1	-0.0237504	0.520651	0.765454	0.590102	0.375562	0.860192
POU2AF1	-0.384082	0.573673	0.808776	0.590094	0.605017	0.896828
OR2A2	0.0812621	0.0154395	-0.395462	0.590088	0.165343	0.403402
ANTXR2	0.28476	0.483006	0.613177	0.589993	0.206084	0.856376
MCHR2	0.14457	0.540465	0.291839	0.589754	0.706825	0.80265
EPT1	0.0101749	0.47428	0.443753	0.589735	0.179719	0.704724
C14orf142	-0.126174	0.387626	-0.819296	0.589542	-0.645538	0.391037
RPGRIP1L	0.192592	-0.0383828	0.101924	0.589468	0.00893778	0.585363
ZBTB45	-0.345824	-0.0383828	0.005708	0.589468	-0.0537547	0.585363
NCAPH2	-0.593585	0.503465	0.307389	0.589461	0.862994	0.931725
KLF8	0.574902	0.583179	-0.107939	0.589133	-0.216605	0.858583
MIXL1	0.101108	0.598672	0.452848	0.589008	-0.116469	0.741497
MIR4513	0.264664	0.258696	0.458955	0.588953	-0.035788	0.660911
MYBL1	0.466388	0.138195	0.153194	0.588769	0.102542	0.361358
CAPS	-0.30722	0.586381	0.260826	0.588621	-0.15942	0.693891
GCC1	0.318152	0.265076	-0.0955313	0.588536	-0.113308	0.448663
LOC100268168	-0.0882248	0.541353	0.370974	0.588372	0.318202	0.851842
DNM1P41	0.165139	0.490647	0.340639	0.588073	0.108049	0.915651
DSCAM-AS1	-0.0430873	0.662364	0.102807	0.587965	-0.316364	0.846491
ZDHHC12	0.266802	0.316196	0.588665	0.58775	-0.0222445	0.335541
POLA2	-0.238748	0.103813	0.914988	0.587443	0.641697	0.57702
KLHL35	0.139458	0.554044	0.322699	0.587286	0.606622	0.585047
PDCD5	0.516208	0.406781	-0.221757	0.58722	-0.465799	0.703884
C14orf166B	-0.305939	0.561392	0.15163	0.587038	0.656121	0.756827
BTBD6	0.145037	0.534324	0.335723	0.586853	-0.0326611	0.855997
EIF3E	0.229593	0.594093	-0.466375	0.586657	-0.447935	0.680985
SEC14L5	-0.572436	0.482993	0.386844	0.58651	0.394244	0.885037
TIMM23	-0.2618	0.358083	0.442701	0.586442	0.507707	0.501642
CTU2	-0.465766	0.240325	0.318798	0.585984	-0.214313	0.640456
OGFRL1	-0.0845132	0.61542	-0.475388	0.585891	0.261517	0.850367
CHRNA2	-0.696438	0.567017	0.312044	0.585383	0.271213	0.833701
FCGR1B	-0.367369	-0.0807628	0.398339	0.585348	0.624331	0.436473
CDK12	-0.421656	0.340766	0.803053	0.585222	0.695001	0.680088
ABHD14A	0.0623795	0.526449	0.131821	0.584744	0.171229	0.772986
KLF13	-0.238226	0.528948	0.224913	0.584645	0.483413	0.774454
H2AFJ	0.545028	0.544569	0.110996	0.584573	-0.437984	0.685766
ADAD2	0.116476	-0.194264	0.617605	0.584189	0.0936073	0.17881
BAP1	-0.345647	0.547871	0.598967	0.584145	0.433115	0.876512
AK4	0.0370804	0.452397	0.427925	0.58379	0.0911275	0.461011
CUX1	0.229648	0.425793	0.385711	0.583523	0.134264	0.725983
NPC1	-0.351003	0.585105	0.312787	0.583383	0.690375	0.794228
CNIH2	-0.266652	0.305706	-0.39708	0.583163	-0.0590252	0.508189
LOC147646	-0.196591	0.270401	0.0189249	0.582904	-0.112237	0.251556
ERI2	-0.534881	0.478584	0.513365	0.582761	0.422109	0.691434
STAG3L3	-0.367369	-0.388598	0.398339	0.582722	0.624331	-0.0986373
SLC2A14	-0.231774	0.299087	0.12457	0.582722	0.725583	0.615514
C2	-0.269208	0.334489	-0.093419	0.582531	0.747378	0.356438
CPEB2	-0.136185	-0.0904732	0.100503	0.582497	0.413946	0.526017
HIST1H2BN	0.150945	0.540699	0.207017	0.582458	-0.119527	0.725233
PPIF	-0.470283	0.0132611	0.133776	0.582124	0.632826	0.340669
SIL1	0.206132	-0.0524845	0.262916	0.581621	0.288953	0.552002
TMEM154	-0.535735	0.0726648	0.156399	0.581597	0.319748	0.0822695
ABHD14B	-0.705768	-0.00293849	-0.116824	0.580914	0.490898	0.079057
CLEC2B	-0.495685	0.188429	-0.308144	0.580855	-0.446459	0.668536
AK3	-0.286142	0.678461	0.416227	0.580492	0.251741	0.81736
CSK	-0.345375	0.547864	0.416684	0.580375	0.293797	0.614891
FRY	0.541144	0.208693	0.625963	0.580365	-0.0398427	0.489102
TAF2	-0.0671164	0.681873	-0.692868	0.579911	-0.0227769	0.796421
TK1	-0.0979505	0.635245	-0.207095	0.579574	0.401503	0.915658
UBL3	0.200899	0.538354	0.261383	0.579265	0.174341	0.859513
PNN	-0.0158093	0.614587	0.220703	0.57922	0.24539	0.71784
C5orf56	-0.400876	0.571329	0.663536	0.579138	0.728353	0.896245
SLC26A6	-0.340839	0.210765	0.601619	0.578878	0.0127415	0.52807
HHLA3	-0.324013	0.445989	0.838353	0.578773	0.503673	0.797764
H3F3A	-0.426868	0.515401	0.520406	0.578633	0.187886	0.752195
C14orf1	-0.18389	0.173271	-0.307925	0.578188	0.0829006	0.61254
CDK4	-0.275379	0.563145	0.470462	0.578034	-0.0519943	0.809782
ZNF117	0.583516	0.665484	0.299946	0.577893	0.145805	0.805894
HIST1H4A	0.663641	0.269082	0.138412	0.577811	-0.435029	0.455108
BTG3	0.223442	0.563214	0.0072244	0.577499	-0.16483	0.825163
ACSL1	0.00565319	-0.0833435	0.727174	0.577392	0.20083	0.109277
PODXL2	-0.301559	0.615646	0.0230603	0.576791	0.266364	0.788572
LOC285758	-0.428984	0.314706	0.466591	0.575834	0.411283	0.668579
NCOA3	-0.302262	0.48993	0.124352	0.575668	0.824486	0.9199
GPR110	0.525921	0.284574	0.167054	0.575623	0.253636	0.505367
KLF9	-0.152543	0.555319	0.363225	0.575265	-0.179939	0.892342
CKAP4	-0.297479	0.507407	0.600862	0.575241	0.539709	0.752733
POLR2J	-0.223166	0.265934	-0.0474142	0.575166	0.497063	0.551837
NUCKS1	-0.307879	0.617825	-0.0239167	0.574823	0.150801	0.792233
SPTLC3	-0.429954	0.278727	0.441685	0.574697	-0.100111	0.643841
TMEM131	-0.296654	0.609058	0.379228	0.574551	-0.160729	0.81515
ACO1	-0.48747	0.36804	0.406265	0.57444	0.266428	0.552621
RFX1	-0.712422	0.327883	0.255864	0.574356	0.0780163	0.404324
WRAP73	0.292657	0.164267	-0.0717208	0.574136	0.327929	0.320759
ZFPM1	-0.238387	0.0754039	0.0782545	0.573361	0.424721	0.518086
LOC257358	-0.330584	0.166391	0.445883	0.573214	0.658965	0.672752
ANAPC2	-0.142159	0.546896	0.281307	0.572864	0.361012	0.478708
SCARNA12	-0.182023	0.167087	0.576508	0.571533	0.101022	0.458514
PLA1A	0.0133334	-0.791721	0.144759	0.571478	0.0801933	-0.544874
MAN2C1	0.376915	0.345609	0.510966	0.571384	0.22086	0.663687
PPIG	0.0704286	0.619217	0.593049	0.5713	0.323296	0.807043
AVEN	-0.13769	0.290789	0.651853	0.571243	0.279895	0.413033
FLJ33581	0.306899	0.290789	0.482628	0.571243	0.110425	0.413033
ISCU	-0.112545	-0.309423	0.296442	0.571161	0.268782	0.0264692
PHLPP1	0.00307142	0.374198	-0.459123	0.571156	-0.166448	0.600224
DCTD	-0.360603	0.343106	-0.396844	0.570849	0.405906	0.425119
COQ4	0.197118	0.410363	0.186081	0.570653	-0.401306	0.835734
LOC731223	-0.214737	-0.151987	0.404264	0.570353	0.303418	0.20632
ZNF175	-0.163449	0.65062	0.637643	0.570327	0.0330427	0.797454
CCR2	-0.723965	0.221549	-0.13826	0.570127	0.598242	0.636577
EMX1	-0.156553	0.51925	0.385302	0.569876	0.0854772	0.70423
LINGO3	-0.392435	0.506095	0.0933814	0.569375	0.676196	0.847779
HSD17B7P2	0.348373	0.198923	0.746182	0.568654	0.311045	0.289383
KCNH2	-0.259907	0.267299	0.845892	0.568635	0.355286	0.370943
FAM120A	0.426974	0.59841	-0.451769	0.568577	0.0806103	0.755172
S1PR4	-0.393376	0.607942	-0.251506	0.568448	0.369578	0.913237
RALGAPB	-0.340839	0.20165	0.601619	0.568391	0.0127415	0.150201
NR1H2	-0.473666	0.462849	0.531367	0.56831	0.742038	0.826651
CXCR2P1	0.0401646	0.566353	-0.405112	0.56816	-0.0817491	0.601305
SLC16A13	-0.239281	-0.144493	0.222951	0.568103	0.359535	0.459558
LAMA2	-0.0745492	0.499211	-0.488395	0.567495	-0.536161	0.831831
DLG4	-0.393861	0.513317	0.0216818	0.566861	0.249871	0.872038
MGC27345	-0.182481	0.594268	0.00510539	0.56685	0.31086	0.847539
FAM129A	0.100671	0.666962	0.840433	0.5667	0.445173	0.783137
SYTL1	-0.366999	0.590288	0.108164	0.566656	0.166144	0.624568
C17orf53	-0.173105	0.508991	0.503857	0.566514	0.315758	0.523098
PLEK	0.243407	0.316268	0.345435	0.566397	0.128782	0.439017
PLEK2	-0.0462222	0.400379	0.492348	0.565856	-0.00745443	0.403594
PPIP5K1	0.229332	0.644129	0.0743805	0.565743	-0.0287909	0.86231
BAZ1A	0.0253404	0.576762	0.42423	0.565449	0.444248	0.872205
ITGB2	-0.171993	0.683129	0.083301	0.565364	0.362063	0.85674
PDIA3P	-0.360603	0.384975	-0.396844	0.565332	0.405906	0.566177
MCOLN2	0.44683	0.510754	-0.160344	0.565209	0.232379	0.833459
GAB3	-0.855769	0.514455	0.395349	0.56517	0.647387	0.697412
SPIRE2	-0.242805	0.499756	0.571661	0.564509	0.492802	0.891917
TBC1D24	-0.184024	0.679973	0.588797	0.564368	0.306501	0.859934
PSMD9	0.265182	0.553477	0.527282	0.564361	0.0519038	0.849121
KDM4A	0.316672	0.655549	0.309323	0.564236	-0.379712	0.686673
BCAN	-0.360603	-0.47331	-0.396844	0.564169	0.405906	-0.338985
ID2	0.151091	0.665633	-0.310015	0.564155	0.254486	0.788302
FPR1	-0.340839	-0.0130012	0.601619	0.564082	0.0127415	0.551837
DRAM1	-0.026658	0.637447	0.644994	0.563401	0.314751	0.82689
PEAK1	-0.588105	0.599968	0.400809	0.56317	0.183892	0.934387
GNB1	-0.0924504	0.44198	0.284337	0.563046	0.253312	0.621704
RGL2	-0.337961	0.516708	0.74529	0.563009	0.294374	0.818184
IZUMO4	-0.37873	0.0657861	0.372662	0.562915	0.190752	0.372044
DDX1	-0.142159	0.647263	0.281307	0.562748	0.361012	0.7647
SOD2	-0.207866	0.265889	0.288687	0.562579	0.634083	0.747862
DNMT3B	0.285836	0.301029	0.152574	0.562327	-0.316341	0.166627
CHADL	-0.364531	0.51543	0.279789	0.562274	-0.153705	0.629873
CDK2AP2	0.731561	0.146072	-0.229461	0.562246	-0.280822	0.142592
FAM9C	-0.300427	-0.450204	0.451377	0.562201	0.650152	-0.0983557
PIM3	0.0588929	0.388012	0.678927	0.562195	0.461251	0.872246
VPS16	0.08456	0.498786	0.437881	0.562049	0.356262	0.514779
CYTH3	-0.154662	0.596396	0.162187	0.561889	0.17753	0.910807
RNF34	-0.294218	0.673826	0.210518	0.561726	0.295671	0.874927
GLS	-0.469945	0.304359	0.788298	0.561639	0.738676	0.824173
MRPS6	-0.0074491	0.399634	-0.577836	0.561637	-0.217207	0.252598
FAM86B1	0.141004	0.361968	-0.513091	0.561346	0.0327439	0.485126
SNORA78	-0.377874	0.171987	-0.363961	0.560998	-0.492063	0.192875
SAFB	0.124602	0.647703	0.566084	0.560907	0.144265	0.89111
HLA-F-AS1	-0.0950443	0.629185	0.751405	0.56083	0.343809	0.901969
HPS3	-0.221457	0.264369	0.322667	0.56065	-0.367081	0.571625
BRIX1	0.356535	0.641071	0.368495	0.560148	-0.108651	0.863371
DDHD2	-0.479375	0.621739	0.783783	0.559964	0.552124	0.717716
TUBGCP2	-0.509124	0.360968	0.0100445	0.55994	0.371639	0.78064
GADL1	-0.142159	0.313775	0.281307	0.559773	0.361012	0.297651
MUC21	-0.160418	-0.129835	0.942294	0.559655	0.495141	0.137885
CCDC120	-0.280685	0.551016	0.828827	0.559286	0.661126	0.85586
ACOX2	0.653298	0.40576	-0.566233	0.558965	-0.221506	0.588307
PTCRA	-0.340839	0.561755	0.601619	0.558881	0.0127415	0.538097
ZNF134	-0.340839	0.561755	0.601619	0.558881	0.0127415	0.538097
MT1F	-0.140346	0.561755	0.528086	0.558881	-0.13176	0.538097
NAGPA	0.306899	0.561755	0.482628	0.558881	0.110425	0.538097
ISCA2	0.0347456	0.561755	0.389285	0.558881	-0.221506	0.538097
FARS2	0.493341	0.561755	0.207017	0.558881	0.109819	0.538097
RNU11	0.493341	0.561755	0.207017	0.558881	0.109819	0.538097
RAB20	-0.593663	0.561755	0.200642	0.558881	0.651148	0.538097
SEMA3C	0.102514	0.561755	0.153207	0.558881	0.119527	0.538097
SPRED2	-0.160283	0.561755	0.14244	0.558881	0.778807	0.538097
KCTD11	-0.282142	0.561755	0.0377505	0.558881	-0.40296	0.538097
ANKRD54	0.297508	0.561755	0.00816811	0.558881	0.297253	0.538097
ALKBH8	0.160708	0.561755	-0.0250164	0.558881	0.43396	0.538097
CD248	0.0741828	0.561755	-0.0833368	0.558881	0.112143	0.538097
SH3RF3	0.386331	0.561755	-0.0919243	0.558881	-0.302761	0.538097
NAF1	0.558739	0.561755	-0.14454	0.558881	-0.29956	0.538097
KCNMB1	-0.377874	0.561755	-0.363961	0.558881	-0.492063	0.538097
SLITRK4	0.0196506	0.561755	-0.373303	0.558881	0.0787784	0.538097
CYB5A	-0.360603	0.561755	-0.396844	0.558881	0.405906	0.538097
TMEM199	-0.360603	0.561755	-0.396844	0.558881	0.405906	0.538097
MPP4	-0.360603	0.561755	-0.396844	0.558881	0.405906	0.538097
GIPC1	0.464497	0.561755	-0.507452	0.558881	-0.477501	0.538097
UCK2	0.464497	0.561755	-0.507452	0.558881	-0.477501	0.538097
UBE3C	-0.340839	0.0411234	0.601619	0.558539	0.0127415	0.641722
WRNIP1	-0.139204	0.551155	-0.415153	0.55846	0.294947	0.901549
ABI3	-0.625625	0.399293	0.286209	0.558419	0.769916	0.855475
GALK1	0.0881898	0.465903	-0.119868	0.558253	-0.291943	0.626916
TSPAN31	-0.355041	0.593413	0.464834	0.557888	0.219045	0.884609
GBP2	-0.259515	0.586902	0.732564	0.557866	0.351268	0.768019
ZRANB1	-0.612306	0.619476	-0.209882	0.557338	0.378483	0.844128
TCTN1	-0.397244	0.418344	0.544882	0.557314	0.421062	0.67558
DIP2B	-0.0390376	0.661162	0.400737	0.557048	-0.241765	0.770002
UBAP2L	0.337233	0.548025	0.438322	0.556965	-0.0439884	0.802326
PLXNB2	-0.110915	0.631647	0.0371718	0.556691	0.560284	0.853094
RPS21	-0.167086	0.62158	0.346069	0.556456	0.576819	0.842957
PALM3	-0.191707	0.608665	0.605655	0.55634	0.482061	0.659787
TDGF1P3	0.0642193	0.515888	0.598334	0.556125	0.547381	0.70427
TNIP1	-0.195509	-0.61305	0.517184	0.555931	0.579028	-0.2308
HPR	-0.21092	0.294937	0.0210272	0.555792	0.0806681	0.751377
GLT1D1	-0.796701	0.281478	0.145714	0.555722	0.674568	0.739379
TTC9	-0.48893	0.33534	0.622546	0.555123	0.595084	0.853905
MPHOSPH10	-0.615201	0.300638	0.221665	0.55509	0.489151	0.447665
AMPD2	-0.563478	0.224132	0.87149	0.55494	0.680669	0.633078
TNFAIP2	-0.128825	0.609386	0.521719	0.554919	0.75809	0.929472
ZNF287	-0.535735	-0.165245	0.156399	0.554454	0.319748	-0.03222
NLRX1	-0.160283	-0.165245	0.14244	0.554454	0.778807	-0.03222
PPP6C	0.0944454	-0.165245	0.0719208	0.554454	-0.354966	-0.03222
AIRE	0.162289	0.667832	0.175008	0.554442	0.0406706	0.881813
CX3CR1	-0.565213	0.0516206	0.565085	0.554374	0.643483	0.550429
TRIM66	-0.14044	0.634337	0.834963	0.554356	0.316862	0.921768
KIAA1430	-0.0196506	0.325627	0.373303	0.554349	-0.0787784	0.587736
ASXL1	-0.442315	0.63079	0.6177	0.554215	0.305371	0.674999
FUT4	-0.13013	0.579546	0.458116	0.554072	0.466879	0.759407
ZNF280C	0.0152964	0.240984	-0.10053	0.554054	-0.3098	0.751672
LOC145783	-0.549252	-0.0237252	0.318433	0.553914	0.828896	0.581534
MARK2	-0.215881	0.431009	0.309284	0.553885	0.345262	0.890288
MAN2B1	-0.0688375	0.460293	0.565149	0.553655	0.308393	0.790209
HIST2H2BF	-0.336265	-0.288085	0.688884	0.553613	0.819858	0.145383
SMARCD2	0.534247	0.541716	-0.217143	0.553415	-0.0330634	0.875831
SEC13	-0.0138678	0.374499	0.599849	0.55339	0.073147	0.728884
RRM2	-0.301172	0.521399	0.366452	0.553112	0.719791	0.752212
BTG1	-0.0347785	0.552715	0.46552	0.553091	0.282424	0.697658
MLLT4	0.164451	0.210847	0.655417	0.552642	0.573343	0.0673313
ZFPL1	-0.535735	-0.32442	0.156399	0.552481	0.319748	-0.191856
ORAI1	0.440633	0.569202	0.50088	0.552241	0.156957	0.915725
ZNF271	-0.409833	0.163846	0.405935	0.551801	0.725707	0.669431
IRF3	-0.765089	0.516359	0.168622	0.551587	0.58206	0.772132
FAM127B	-0.0646778	0.235292	-0.440417	0.551443	-0.743436	0.313996
MICA	-0.141747	0.544009	0.764995	0.551319	0.519342	0.859359
ST6GALNAC2	0.215685	0.574715	0.20845	0.551169	0.255848	0.899497
ING1	-0.244617	0.557986	0.880242	0.551128	0.623756	0.912074
MAK16	-0.306485	0.64704	-0.0380414	0.55098	0.0530561	0.81207
RBM20	-0.171959	0.566051	0.520239	0.550916	0.0857973	0.853761
C4BPA	-0.536507	0.566051	0.486418	0.550916	0.427003	0.853761
EFTUD2	-0.463135	0.566051	0.476531	0.550916	-0.150093	0.853761
SELT	0.493341	0.566051	0.207017	0.550916	0.109819	0.853761
FZD1	-0.535735	0.566051	0.156399	0.550916	0.319748	0.853761
PIH1D1	0.539806	0.566051	-0.0643177	0.550916	0.00772705	0.853761
RCN3	-0.504674	0.566051	-0.0912697	0.550916	0.391821	0.853761
ZFYVE26	-0.161864	0.566051	-0.206768	0.550916	-0.0402045	0.853761
CASP7	-0.360603	0.566051	-0.396844	0.550916	0.405906	0.853761
SLAIN2	0.0536609	0.659272	-0.0213011	0.550546	0.0591264	0.849936
C15orf37	-0.381893	0.671207	0.598809	0.550378	0.610777	0.805158
AGTRAP	0.0184042	-0.732614	0.690695	0.549804	0.79684	-0.314558
EFNB1	0.101381	0.46379	-0.144983	0.549759	0.393892	0.340574
NBAS	0.101381	0.46379	-0.144983	0.549759	0.393892	0.340574
PLCB3	-0.587296	0.700217	0.466101	0.549732	0.454885	0.884701
SRBD1	-0.187164	-0.387591	-0.866384	0.549465	-0.385052	-0.141545
OAZ1	-0.508693	0.593693	0.399596	0.549367	0.104911	0.737929
2019-03-08	-0.416089	0.629176	0.513309	0.549065	0.579457	0.897914
ANKRD32	-0.309702	0.566298	-0.430172	0.549002	0.0169361	0.881969
NFKBIE	-0.170352	-0.415622	-0.129283	0.548961	0.475443	-0.377984
KCNK3	0.408426	0.422123	0.109662	0.548709	0.159663	0.879982
C7orf63	-0.3605	0.475399	0.744898	0.5485	0.261822	0.695314
SEC22B	-0.243123	-0.728893	0.432142	0.548069	0.629197	-0.35148
RS1	0.389554	0.119478	0.207009	0.547856	-0.196399	0.29491
PHOSPHO1	-0.596532	0.606396	-0.104852	0.547454	0.276418	0.862728
PTH	0.0793504	0.294932	-0.690668	0.547386	-0.0546815	0.70499
ACSS3	0.273273	0.0322092	-0.550251	0.546928	-0.00185361	0.388297
KLHL5	-0.187882	0.3495	0.495663	0.546854	0.507376	0.77981
DCPS	-0.34192	0.589249	0.081199	0.546742	0.409153	0.585962
PRB2	0.477827	-0.0689062	0.0199464	0.546649	0.0131452	0.406481
LOC100499489	0.351926	0.685399	0.225115	0.546405	0.304598	0.881663
MPDU1	-0.0106665	0.498835	0.660497	0.5464	0.0767581	0.484865
CXorf23	-0.00179657	0.66642	0.836676	0.546371	0.36439	0.892157
LOC286367	-0.0578926	0.509768	0.479391	0.546368	0.501502	0.753572
MAF	0.472791	0.307638	-0.666533	0.546358	-0.259283	0.783162
USP1	0.23455	0.604804	-0.538849	0.546088	-0.328227	0.767972
DHRS4L2	-0.204988	0.673631	0.61213	0.54555	0.807178	0.907736
HAUS4	-0.484833	0.374529	0.512241	0.545221	0.189896	0.839385
LLPH	0.217087	0.552852	0.167209	0.545206	-0.10275	0.727666
MIF	-0.491922	0.00460124	0.216733	0.545136	0.676965	0.145815
MCM3	-0.521065	0.611792	0.523064	0.545011	0.183698	0.725093
LHB	0.265443	-0.311614	0.101221	0.544672	-0.523219	0.215526
PLA2G12A	0.228625	0.678896	0.341691	0.544527	0.282749	0.873924
P2RX6	-0.340839	-0.680878	0.601619	0.544333	0.0127415	-0.363479
LOC727982	-0.420943	-0.680878	0.267012	0.544333	-0.245786	-0.363479
FARSA	0.0354213	-0.680878	0.161037	0.544333	-0.144732	-0.363479
KCNJ2	0.386331	-0.680878	-0.0919243	0.544333	-0.302761	-0.363479
C2orf44	0.670961	0.244887	0.183283	0.544229	-0.050152	0.820325
TMEM231	-0.342382	0.459178	0.0760095	0.543651	-0.0693264	0.592247
IL13RA1	0.0630902	0.691154	0.193655	0.543489	-0.579485	0.813418
REEP3	-0.130411	0.642447	0.590468	0.542946	0.522362	0.921751
PIDD	0.0656398	0.594644	0.838437	0.542805	0.245158	0.787806
KBTBD2	0.592856	-0.080485	0.105306	0.542717	0.0552583	0.357906
GPN3	-0.501921	0.52684	0.120487	0.542621	0.111081	0.896811
TTYH1	0.198085	0.37966	0.527489	0.542282	0.124738	0.852554
ARMCX3	-0.671711	0.368309	0.468386	0.542185	0.779813	0.372561
RIN2	-0.1384	0.368309	-0.587038	0.542185	-0.694552	0.372561
TET2	-0.238889	0.458459	0.573367	0.542041	0.292665	0.866941
ASZ1	-0.321892	0.504832	0.307033	0.541755	0.425443	0.771989
HTR2A	0.634373	0.406802	-0.269037	0.541609	-0.264139	0.35021
HOXB3	-0.268806	0.707162	-0.106853	0.541462	0.392947	0.856823
FAM117A	0.0751542	0.260257	0.729802	0.541174	0.153672	0.757169
CYP2B7P1	-0.140881	0.637797	0.779011	0.54114	0.786235	0.832008
ANKS1A	0.368094	0.452546	0.489607	0.541082	-0.1231	0.897455
HLA-DMB	0.014483	0.452546	0.234028	0.541082	0.245603	0.897455
CCDC25	-0.661513	0.324031	0.16666	0.541071	0.0430783	0.51316
CCT8	-0.373685	0.474835	0.220273	0.540992	0.198663	0.655326
RAX2	-0.253195	0.524741	0.420662	0.540601	0.495443	0.738089
ZNF461	-0.310754	0.372702	0.716876	0.54052	0.267298	0.205064
CTR9	-0.274248	0.575252	0.157704	0.540245	0.00783366	0.692259
TPI1	-0.336686	0.575303	0.0538102	0.539941	-0.181789	0.795352
CDC25B	-0.039907	0.636357	0.177304	0.539849	0.472957	0.737253
ABCA1	0.320543	0.531181	-0.577699	0.539807	0.0343646	0.471363
SLC9A8	-0.457383	0.523839	0.249007	0.539481	0.650629	0.796697
SPATA13	0.194737	0.681298	0.413765	0.539355	0.395673	0.705136
LOC440700	-0.425914	0.485312	0.56715	0.539098	0.863462	0.737855
ODF3	-0.00948315	-0.0385909	0.366869	0.539021	-0.456691	0.186101
HMG20A	-0.124693	-0.446836	-0.247529	0.53896	-0.415463	0.0186537
SNORA51	0.675881	-0.446836	-0.383901	0.53896	-0.401624	0.0186537
ASPH	0.0022877	0.382921	-0.173686	0.538926	-0.372815	0.421375
NSD1	-0.326286	0.616245	0.00798449	0.538819	0.737119	0.903237
AFAP1-AS1	0.0768439	0.624109	0.707202	0.538477	0.637316	0.851144
C5orf25	0.306441	0.560777	0.49235	0.538395	0.191027	0.856159
FAM20A	-0.661805	0.564506	-0.0906229	0.538181	0.438831	0.760216
MTMR11	-0.202617	0.215455	-0.153865	0.538049	0.600882	0.670833
DHRS7B	-0.311924	0.0075627	0.257887	0.537827	-0.382263	0.300644
ALG10B	-0.31562	0.671298	0.428444	0.537706	0.436682	0.835072
ATG2A	0.408162	0.469604	-0.163682	0.537649	-0.057907	0.710302
COIL	-0.45698	0.53637	0.401513	0.537631	0.235259	0.707809
PLA2G2F	-0.439748	0.315595	0.432231	0.537606	0.798129	0.44966
ZFY	-0.686343	-0.693135	-0.133894	0.537426	0.616969	-0.247004
ABT1	0.148491	0.449129	0.36416	0.536992	-0.195648	0.877311
NODAL	-0.263118	0.458802	0.098501	0.536916	-0.00570332	0.8474
CLDN3	-0.360603	-0.637123	-0.396844	0.53683	0.405906	-0.0191856
TEF	-0.329896	0.489683	0.344574	0.536248	0.470455	0.831395
TBPL1	-0.567258	0.271632	-0.113926	0.535568	0.612154	0.733196
HOMEZ	-0.0172239	0.53226	0.49971	0.535537	0.123419	0.784481
TRAPPC6B	-0.308913	0.590464	0.363255	0.535483	-0.108788	0.543686
ZNF512	-0.285235	0.611186	-0.366966	0.535439	0.102049	0.590592
LPPR2	0.074838	-0.181422	0.169127	0.535352	-0.179521	-0.00209443
SYNPO	0.0604262	0.440221	0.682669	0.535278	0.302857	0.608618
ANKRD34A	-0.190318	0.480561	0.26127	0.535173	-0.0162585	0.394546
TMED6	-0.347435	0.64525	0.766808	0.535089	0.320935	0.674722
MON1B	-0.130705	0.428326	0.860258	0.534768	0.578475	0.332449
PTPN18	-0.0949295	0.702394	0.164856	0.534688	0.296428	0.787836
RPAP2	-0.730136	0.437874	0.412005	0.534435	0.712491	0.412431
ANKRD50	0.101381	0.437874	-0.144983	0.534435	0.393892	0.412431
IFI27L2	0.464497	0.437874	-0.507452	0.534435	-0.477501	0.412431
TMEM106B	-0.228982	0.322367	0.081199	0.534384	0.359068	0.287745
LOC439994	0.470173	0.64375	0.432222	0.534161	0.114427	0.818635
BRCC3	0.208292	0.454828	-0.0560422	0.534128	0.290723	0.756016
CDS2	0.0136211	0.423952	0.363213	0.534047	-0.271818	0.370615
SUGT1P1	-0.356664	0.541237	0.336813	0.534035	0.555079	0.66327
HAVCR1	-0.0640158	0.210299	0.493719	0.533979	0.54316	0.45161
NRBF2	-0.0970017	0.408801	0.489453	0.533582	0.357869	0.782243
ZNF668	-0.0242124	0.66889	-0.185133	0.533347	-0.294785	0.891144
CUL4A	0.373566	0.293932	0.332205	0.533062	0.387404	0.321937
GEMIN4	-0.609723	0.579722	-0.100516	0.532884	-0.11537	0.660338
PRKAB2	0.165115	0.288931	0.46269	0.532773	0.178185	0.315579
NFKBIL1	-0.559059	0.609617	0.782175	0.532513	0.640435	0.74941
KIAA1522	0.085129	0.686291	0.0962607	0.532248	0.274822	0.771151
HRNR	0.61142	0.242627	-0.345028	0.532136	-0.229549	0.486519
S100A9	-0.194909	0.551716	0.0406949	0.532064	0.467142	0.817559
SQLE	0.58388	0.169354	-0.15914	0.531806	0.0719347	0.156661
INF2	0.208059	-0.171424	0.38513	0.531787	-0.166518	0.399967
SLAIN1	-0.103202	0.0202943	0.330631	0.531696	-0.214795	0.458606
SFT2D2	0.169591	0.0202943	-0.0632739	0.531696	0.0337107	0.458606
EXT2	0.731561	0.0202943	-0.229461	0.531696	-0.280822	0.458606
TUBA8	0.401943	0.546602	-0.603125	0.531676	-0.170133	0.722106
NBR2	0.245806	-0.181785	-0.302423	0.531613	-0.231164	0.251812
SUOX	0.119128	0.589585	0.517715	0.530976	0.466183	0.91884
DHFRL1	-0.40971	0.604051	-0.00185918	0.530968	0.486553	0.74716
SYNGR2	0.365143	0.399746	0.254847	0.530968	0.0843363	0.500301
SERINC3	-0.268838	0.642878	0.620516	0.530944	0.0296718	0.65163
SLC25A3	-0.494171	0.587692	0.0976098	0.530938	0.65246	0.736215
PJA1	-0.503489	0.25003	0.398817	0.530905	-0.221715	0.493499
GRTP1	-0.102176	0.67481	0.129531	0.530765	-0.560172	0.880948
ANXA2P2	-0.450924	0.581693	0.307711	0.530741	0.56133	0.511401
CEBPD	-0.269524	0.446833	-0.174599	0.530489	0.661695	0.745063
METTL6	-0.170247	0.706338	0.598279	0.530468	0.154349	0.848371
ANKZF1	-0.49149	0.689076	0.0867344	0.530384	0.531663	0.787809
PTMS	0.415144	0.250811	0.469611	0.530383	0.268081	0.320354
ITGAX	-0.221184	0.534402	0.422711	0.530341	-0.0992326	0.914718
ORAI3	0.544865	0.245532	-0.234255	0.530219	0.0128231	0.35305
CAMK1	-0.426818	0.60854	0.324676	0.530112	0.250762	0.868996
CAPN3	-0.42851	0.639469	0.242593	0.529884	0.537529	0.835928
SYTL4	-0.632651	0.556277	0.334836	0.529848	0.33402	0.763167
USPL1	0.539194	0.18219	0.51175	0.529785	0.0233536	0.337472
FANCE	0.0876066	0.18219	-0.229232	0.529785	0.152114	0.337472
ASPHD2	-0.12427	0.570265	0.503937	0.529666	-0.122534	0.770136
MRPS5	-0.142159	0.519837	0.281307	0.529579	0.361012	0.526128
DAPP1	-0.263916	0.430705	0.769024	0.529564	0.230647	0.564827
ALOX12B	-0.346142	0.67669	0.482097	0.529558	-0.083129	0.788084
SPRYD3	0.2893	-0.0367341	0.023794	0.529555	-0.129454	0.234807
LRWD1	0.0580705	0.65456	0.399096	0.529404	0.306823	0.761391
MEPCE	0.438456	0.477806	0.232861	0.529401	0.274127	0.698768
PSMA4	0.281693	-0.0277651	0.0960653	0.529401	0.555974	0.199289
PRKY	-0.238381	0.274154	0.147798	0.529271	0.344481	0.70064
LOC100289561	-0.789347	0.614467	0.335551	0.529255	0.51475	0.819121
S1PR2	-0.137739	0.610269	0.706939	0.529221	0.283096	0.925573
EIF4G3	-0.414147	0.604722	0.201893	0.529177	0.379527	0.601975
MESDC2	-0.440995	0.61932	0.546213	0.529016	0.66724	0.895712
EPM2AIP1	0.12777	-0.130477	0.29393	0.528892	0.28033	0.074091
C7orf31	-0.495282	0.487793	0.383191	0.528651	0.204992	0.575282
ARFRP1	0.515715	0.403505	0.500385	0.52864	-0.0942792	0.597825
ZCCHC8	0.105092	0.717274	0.556245	0.528421	0.514356	0.870346
CBY3	-0.0456885	0.583714	0.148082	0.528209	0.303665	0.803007
MIR3190	-0.257688	0.218202	-0.132281	0.528069	0.397412	0.229115
TRAF3IP1	-0.580031	0.482753	0.324772	0.528021	0.560399	0.775244
LOC100131635	0.15753	0.0948956	0.405691	0.528015	0.615126	0.643425
TROVE2	-0.573464	0.664156	0.277102	0.5277	0.355812	0.782594
LTB4R2	-0.557737	0.688551	-0.264621	0.527685	0.476745	0.843596
ENO4	-0.201475	0.649652	0.255161	0.52745	-0.0607543	0.91493
DBI	-0.121847	0.547782	0.272842	0.527074	0.459695	0.713366
PPP1R14B	0.193975	0.579025	0.470206	0.526626	0.563002	0.71482
TMEM50B	-0.470412	0.484785	0.352496	0.526574	0.547176	0.76057
XK	-0.340839	-0.389391	0.601619	0.526541	0.0127415	0.0365413
RBMX2	0.00958188	0.641199	-0.351569	0.526541	-0.04628	0.916119
GSDMA	-0.455286	0.4904	0.376653	0.526465	0.261052	0.784038
OR52I1	-0.787249	0.491791	-0.163249	0.526397	0	0.367544
SHD	0.517576	0.575358	0.269547	0.526204	0.161168	0.863532
LPO	0.0995094	0.687113	-0.237246	0.526148	-0.257424	0.738103
ZCCHC24	-0.399955	0.434135	0.703227	0.526106	0.729448	0.803654
SDCCAG8	0.459417	0.649638	0.380085	0.526012	0.0391681	0.888916
BTG2	-0.540698	0.607222	0.745173	0.52594	0.359057	0.911024
SYNJ2	-0.645952	0.386308	0.513883	0.525848	0.347703	0.736373
SMC3	-0.434051	0.552262	0.436946	0.525782	0.191638	0.653566
KEAP1	0.0881898	0.465806	-0.119868	0.525697	-0.291943	0.472449
SLC35D1	0.369426	0.638746	0.314294	0.525612	-0.149059	0.882889
PDPK1	0.151349	0.573948	0.581536	0.525399	0.170997	0.939215
SRRM1	-0.20527	0.634105	0.391875	0.525156	0.136009	0.935501
UBXN1	-0.151494	0.490671	0.529145	0.524582	-0.0910282	0.78322
CUZD1	-0.741934	0.165787	0.434468	0.524573	0.0990606	0.310329
HINFP	0.493341	0.165787	0.207017	0.524573	0.109819	0.310329
KIAA0196	0.373362	0.165787	0.0468056	0.524573	-0.139948	0.310329
AASS	0.0236166	0.598457	0.581863	0.524534	0.133155	0.897841
P2RY14	-0.145456	0.501483	-0.182058	0.524523	0.552399	0.559868
KLF4	-0.350353	0.466202	0.229913	0.524301	0.465917	0.777458
TMEM135	-0.264094	0.351262	0.303665	0.52404	-0.0917537	0.559517
HHIP	-0.113414	0.351262	-0.737536	0.52404	-0.293765	0.559517
LOC100130015	-0.342805	0.586428	0.796774	0.523975	0.143084	0.860566
WNT3	-0.0236273	0.21512	0.46408	0.523894	-0.212628	0.659398
TUBA1B	0.248281	0.455198	0.647292	0.523769	-0.0674826	0.586349
ZMYM4	-0.0420644	0.65325	0.451547	0.523707	0.862212	0.611553
SNX18	-0.0984404	-0.0990749	0.248964	0.523664	0.414391	0.221642
C9orf37	-0.37711	0.628806	0.0766593	0.523532	0.270771	0.864403
SLAMF7	-0.257682	0.665432	0.644404	0.523523	0.117242	0.932606
RFXANK	-0.501765	0.658226	0.266348	0.523506	0.602719	0.887383
BCL7C	-0.416997	0.690837	-0.246663	0.522929	0.225969	0.688344
NEURL2	-0.194104	0.671835	0.20489	0.522894	-0.402935	0.816531
FZR1	-0.322612	0.35602	-0.234617	0.522736	0.0434413	0.180381
CDC42	-0.471445	0.516995	0.223282	0.52246	0.0816941	0.921892
ARHGAP22	0.101381	0.654405	-0.144983	0.522384	0.393892	0.749885
TNFAIP3	0.497838	0.473167	0.42999	0.522354	0.34181	0.443543
TMEM222	0.206132	-0.269969	0.262916	0.522341	0.288953	-0.0462283
AMPH	-0.348347	0.72078	0.146078	0.522337	-0.289399	0.809118
DUT	-0.0872465	0.161435	0.491849	0.522217	0.889123	0.530113
POLR1D	0.44278	0.637548	-0.00578728	0.522128	-0.0804096	0.951845
FAM201A	-0.349148	0.647007	-0.592152	0.522097	0.2522	0.738013
PIP5K1A	-0.142159	0.162183	0.281307	0.521962	0.361012	-0.00959282
UBE4B	0.39774	0.546458	-0.363354	0.52175	0.165355	0.533891
ITGB8	-0.0107707	0.505442	-0.257053	0.521423	0.26585	0.900077
UBAC2	-0.362711	0.575387	0.656613	0.521327	0.135955	0.926351
CCDC86	-0.239122	-0.00209835	0.256461	0.521293	0.168417	0.415502
CLIC1	-0.446958	0.109474	-0.139008	0.521194	0.237234	0.596433
SCARNA7	-0.0775272	0.546268	-0.105435	0.52101	-0.484538	0.743129
SMAP1	0.122423	0.546268	-0.135446	0.52101	-0.224738	0.743129
CYP1B1	-0.297909	0.376879	-0.291779	0.520775	0.512521	0.593753
ARVCF	-0.579436	0.516206	-0.268617	0.520593	0.0477399	0.612658
HDAC10	-0.275958	0.622535	0.346899	0.520505	0.282612	0.932071
HSD17B2	-0.64709	-0.452762	0.523894	0.520501	0.336739	-0.366605
ZDHHC7	-0.0820749	0.402466	0.206187	0.520146	0.190606	0.37703
EP300	-0.275585	0.59555	0.449623	0.519925	0.112779	0.86576
DHFR	-0.457807	0.645195	0.0573322	0.519868	0.772439	0.760807
ZNF433	-0.0671026	0.611696	0.871052	0.519737	0.609581	0.853452
SLC41A2	-0.266349	0.563914	0.640657	0.519375	0.239732	0.909118
LDB1	-0.387744	0.250191	0.143517	0.519283	0.462786	0.424426
FAM111B	-0.0511303	0.272572	0.370548	0.519056	-0.0461238	0.668839
ZBTB17	-0.356883	0.671319	0.771789	0.518781	0.45404	0.791785
TMF1	-0.213331	0.652393	0.0747094	0.51862	0.0583767	0.824723
SLC25A44	0.51493	0.565915	0.165912	0.518262	0.0455052	0.881928
ZSWIM6	0.101381	-0.235794	-0.144983	0.518069	0.393892	-0.256285
FIG4	-0.564021	-0.235794	-0.581074	0.518069	-0.0658031	-0.256285
LCMT2	0.102514	-0.15775	0.153207	0.517912	0.119527	0.258531
LRRCC1	0.689587	-0.303288	-0.0443919	0.51767	-0.122534	0.113525
RECK	0.244415	0.149952	-0.27523	0.51738	-0.722807	0.709687
OSBPL1A	0.216591	0.621623	-0.103182	0.51731	0.108444	0.644946
C10orf105	-0.622625	0.54211	-0.12286	0.5173	0.454133	0.839401
MRPS33	0.0606255	-0.170429	-0.651546	0.517252	0.0147563	0.392539
DNALI1	0.0678443	0.617799	0.122425	0.517153	0.24324	0.694583
MAMDC4	0.177595	0.589187	0.80822	0.516891	0.314575	0.911701
TTC9C	-0.535735	0.464917	0.156399	0.516826	0.319748	0.490083
SLC10A7	-0.360603	-0.216429	-0.396844	0.516826	0.405906	-0.0169579
TGFBRAP1	0.0347456	0.412311	0.389285	0.51682	-0.221506	0.641455
TSPAN33	0.493341	0.412311	0.207017	0.51682	0.109819	0.641455
DYNC1LI2	0.315221	0.412311	0.0631533	0.51682	-0.321331	0.641455
B3GNT1	0.152043	0.412311	-0.197731	0.51682	0.43824	0.641455
METTL17	-0.377874	0.412311	-0.363961	0.51682	-0.492063	0.641455
TPK1	-0.360603	0.412311	-0.396844	0.51682	0.405906	0.641455
UBQLN1	0.222541	0.522311	0.138223	0.516706	0.0566005	0.658176
HSPA12B	-0.176135	0.680903	-0.816274	0.516527	-0.0937654	0.842317
UQCRH	-0.454119	0.394647	-0.0308967	0.516463	-0.255736	0.614149
LIPT2	0.379826	0.557955	-0.890633	0.516384	-0.331449	0.918768
NRF1	0.0944454	0.00929331	0.0719208	0.516382	-0.354966	0.102945
MAPK1	0.540347	0.00929331	-0.449159	0.516382	-0.0588534	0.102945
CIZ1	-0.485238	0.60638	0.479721	0.516304	0.143221	0.939322
GNAI3	0.17571	0.601298	0.292198	0.516279	0.576541	0.848777
WFIKKN1	-0.371801	0.303629	0.118126	0.516221	-0.329278	0.561829
RALBP1	-0.429979	0.654988	0.1488	0.51617	0.575397	0.766541
MAPK8IP1	-0.745153	0.415224	0.422809	0.516034	0.324592	0.6698
AMT	-0.512294	0.633958	0.683445	0.515872	0.415259	0.897295
TCTEX1D2	-0.438842	0.567611	0.302158	0.515494	0.715345	0.820445
KIAA1279	-0.511104	0.649027	0.664458	0.515258	0.599408	0.854138
AXIN2	0.100341	0.649027	0.077115	0.515258	0.553819	0.854138
GPATCH3	0.0323241	0.649027	-0.389541	0.515258	0.491158	0.854138
KAT7	-0.229481	0.558218	0.694894	0.515232	0.436835	0.846397
C14orf64	-0.104167	0.31366	0.252259	0.515205	-0.300487	0.845255
TMEM55B	-0.264988	0.425156	0.659912	0.515108	0.431389	0.773595
MIR4659B	-0.417196	0.349017	0.559003	0.515018	-0.0818678	0.255373
KLF17	-0.369056	0.349017	0.460713	0.515018	0.188352	0.255373
MICU1	-0.360603	0.349017	-0.396844	0.515018	0.405906	0.255373
AOC4	0.220987	0.63306	0.20307	0.514936	-0.62338	0.72104
PEX19	0.289234	0.655451	-0.55932	0.514862	-0.0835984	0.642548
ZCCHC17	0.368844	0.665152	-0.409287	0.514521	-0.578185	0.877153
CCS	0.493341	0.0292506	0.207017	0.514429	0.109819	0.264404
NKX6-2	0.0203106	0.0292506	-0.0307124	0.514429	-0.241883	0.264404
MIR4785	0.650953	0.0292506	-0.344614	0.514429	-0.341946	0.264404
MIR1539	-0.0413232	0.0292506	-0.496989	0.514429	0.283346	0.264404
FLJ45340	-0.221305	0.671302	0.686055	0.514279	0.666456	0.861572
FLOT2	0.394696	0.594328	0.356205	0.514232	0.208607	0.835885
ZNF326	0.493832	-0.20629	-0.13702	0.51406	-0.253127	-0.271931
PRDM1	0.503073	0.420503	-0.13031	0.513343	-0.588538	0.66358
GUCY2C	-0.469885	0.592634	0.00987383	0.513338	0.616228	0.718291
HSPBAP1	0.121001	-0.00527729	0.194345	0.513271	0.584576	-0.0903415
OSGIN2	-0.13359	0.693215	0.416939	0.513015	0.327095	0.890753
TBC1D23	-0.360603	0.279075	-0.396844	0.512877	0.405906	0.805822
COG7	0.108041	0.713995	0.383922	0.512661	0.204576	0.821314
OR10AD1	0.0494433	0.666616	0.552118	0.512593	0.53549	0.85526
ACTR1A	-0.659103	0.668789	0.480069	0.512513	0.50957	0.74174
CASP4	-0.225843	0.561596	0.214857	0.512348	0.0348862	0.401535
SPAG9	-0.0367055	0.71037	0.5044	0.512286	0.197945	0.863988
MSH3	0.0315694	0.594471	0.359641	0.51221	0.113443	0.8995
SEC23B	0.00903621	0.53956	0.329582	0.512052	0.0916172	0.600327
PELI2	0.171651	0.645053	0.270258	0.512027	0.650728	0.740419
C11orf68	-0.108279	0.516204	-0.278781	0.512004	0.437951	0.552958
THOC6	-0.419224	0.0594265	-0.0825587	0.511768	-0.497625	0.60762
NRG2	-0.225843	0.323764	0.214857	0.511612	0.0348862	0.454322
DIXDC1	-0.270585	0.458191	-0.382148	0.511607	0.127688	0.79883
MYO1H	-0.0631318	0.642719	0.392067	0.511533	-0.308194	0.55849
DNASE1L1	-0.211879	0.628921	0.644604	0.511423	0.0949872	0.848281
BTBD2	-0.490138	0.660181	0.337939	0.51127	-0.135999	0.782765
PRRG1	-0.368233	0.67924	0.757068	0.511134	0.175	0.833871
RNF19B	0.117754	-0.140287	0.0849198	0.511005	0.293531	0.466917
TSC1	0.197512	0.742957	0.478689	0.510751	-0.0865062	0.849881
PIWIL4	-0.161146	-0.818777	-0.591135	0.510732	0.338534	-0.393548
FLJ40448	-0.0989422	0.673374	0.814716	0.510731	0.31286	0.917597
C3orf62	-0.383596	0.632318	0.577029	0.510698	0.792782	0.955997
C17orf78	-0.613445	0.250154	0.0148093	0.510572	0.640509	0.380091
LOC100506713	-0.124761	0.435057	0.00953954	0.510537	0.56949	0.540503
MLLT11	-0.336454	0.62464	0.017124	0.510506	0.0328089	0.674584
SNORD36B	0.434445	0.537096	0.415068	0.510253	-0.0227964	0.541618
USP32	-0.461187	0.537096	-0.113252	0.510253	0.727599	0.541618
H19	0.00876685	0.0961908	0.56526	0.510006	0.600827	0.6056
LMNB2	-0.379476	0.0961908	0.369705	0.510006	0.291305	0.6056
PAWR	0.469338	0.0961908	0.15489	0.510006	-0.252601	0.6056
THOC2	-0.0757299	0.61642	0.290059	0.509921	0.126061	0.769538
HIPK3	0.0866719	0.599981	0.137747	0.509893	-0.442872	0.900704
NSMAF	-0.272281	0.563716	-0.0376799	0.509736	0.400212	0.93455
SEMA4A	0.124016	0.143361	-0.24966	0.509573	0.35088	0.454594
PLEKHA3	-0.0988651	0.129494	-0.357321	0.509441	0.473597	0.476044
LOC283914	0.341242	0.602268	-0.15917	0.509177	-0.260598	0.857369
SF3B2	0.0477916	0.611112	-0.0581329	0.508954	0.384302	0.91485
SNX1	0.0996512	0.686899	0.521964	0.508897	0.0702398	0.905365
RAB33B	0.296284	0.541559	0.51686	0.508891	0.232646	0.911576
HSD17B11	0.493341	-0.012851	0.207017	0.508772	0.109819	0.0674943
PLEKHA4	0.153729	-0.012851	0.187355	0.508772	-0.105564	0.0674943
NLRP11	-0.548926	-0.012851	0.181514	0.508772	-0.366088	0.0674943
LOC400043	0.208088	-0.012851	-0.0932306	0.508772	-0.0460313	0.0674943
SPHK1	0.0905393	-0.012851	-0.20489	0.508772	0.586432	0.0674943
ISOC1	-0.360603	-0.012851	-0.396844	0.508772	0.405906	0.0674943
MLNR	0.0793504	-0.012851	-0.690668	0.508772	-0.0546815	0.0674943
ZNF70	-0.0143099	0.648389	0.606341	0.508245	0.0535616	0.886037
OXA1L	-0.31678	0.523704	-0.216261	0.507912	0.171051	0.873428
SLC30A3	-0.228226	0.39801	0.394201	0.507876	-0.0327765	0.470048
LTA4H	-0.440455	0.378032	-0.152993	0.507816	0.520869	0.843731
CD99L2	-0.0904102	0.651815	-0.479719	0.507803	-0.313941	0.878681
VPS35	-0.328394	0.582213	-0.198258	0.507281	0.444557	0.537287
TSN	0.654182	0.200984	-0.214987	0.50721	-0.0784001	0.70867
MLX	-0.411659	0.693241	0.543699	0.507122	0.647994	0.840823
KDM5C	-0.146488	0.62344	0.566507	0.507069	0.609648	0.694413
TRA2A	-0.0889173	0.293441	-0.0988654	0.50704	0.0401318	0.741256
OSCP1	-0.448792	0.58101	0.46628	0.506688	-0.136245	0.831714
C10orf55	0.221036	-0.191069	0.0955506	0.506638	0.159263	0.438197
KLHL34	0.0834819	0.460323	0.0411821	0.506616	-0.516656	0.591762
PLCD3	-0.00654346	0.480645	-0.0331326	0.506299	-0.127617	0.617362
RANBP3L	-0.64709	0.11326	0.523894	0.506127	0.336739	0.146572
ARRDC5	-0.367369	0.11326	0.398339	0.506127	0.624331	0.146572
IL23R	-0.370836	0.691085	0.592103	0.506052	0.215857	0.881594
ARHGAP21	0.318124	0.326677	0.155462	0.505911	0.322083	0.487728
TRIM28	0.209048	0.664902	0.0948902	0.505821	0.688644	0.832226
GLYCTK	-0.0361233	-0.446044	0.448167	0.505778	0.212549	-0.124182
ZNF296	-0.571746	0.503776	0.121107	0.5057	0.613865	0.910181
VTN	0.0931082	0.351323	0.419865	0.505632	0.296731	0.727935
RNF214	0.297508	0.521947	0.00816811	0.505528	0.297253	0.86815
RGS12	-0.328559	0.742228	0.592076	0.505333	0.254901	0.782636
RAP2C	-0.387141	0.213981	0.739362	0.505269	0.490495	0.574837
ZNF182	0.323178	0.624393	0.563272	0.505206	0.16117	0.773279
ZNF575	-0.284063	0.621066	0.429611	0.505115	0.35832	0.897255
CUBN	0.126006	0.712389	0.36446	0.505083	0.288104	0.787089
ZNF259	-0.357537	0.563898	0.520309	0.50507	0.207339	0.463589
TCEANC2	-0.458118	0.607858	0.695759	0.504829	0.847968	0.669097
LOC100506497	-0.223371	0.460273	0.152389	0.504827	0.657185	0.720121
RAB7L1	-0.00298429	0.664777	0.627616	0.504822	0.487645	0.746828
MBTPS1	0.143466	0.525537	0.479053	0.504799	0.0309435	0.558588
TFDP1	0.00598218	0.622457	-0.0871867	0.504774	-0.0267068	0.78965
TSEN34	0.0347456	0.428655	0.389285	0.504593	-0.221506	0.740203
IL34	0.342417	0.161873	0.27782	0.504564	-0.0140362	0.498031
COMT	-0.603946	0.42756	0.0443818	0.504553	0.391152	0.70524
ZNF629	-0.338951	0.699606	0.261744	0.504517	0.190533	0.892147
PHRF1	0.0499146	0.626565	0.669673	0.504339	0.49226	0.771638
ZNF641	0.324741	0.462175	0.0640532	0.504248	0.31725	0.686142
2019-09-07	-0.134055	0.586899	0.399082	0.504212	0.183671	0.780903
CTNS	0.175615	0.634519	-0.017241	0.504203	-0.0845062	0.882975
RHBDF1	0.209404	0.45633	-0.40407	0.504048	-0.111075	0.637025
ZNF165	-0.107836	0.363657	-0.307822	0.504003	0.548922	0.86746
MINA	-0.209208	0.63924	-0.0637444	0.503785	0.409387	0.891846
CARNS1	-0.0522661	0.508694	0.506337	0.503609	0.394423	0.63265
ZNF362	-0.353744	0.220704	-0.305809	0.503553	0.551308	0.24853
PHACTR1	-0.277108	0.601292	0.82207	0.503551	0.25601	0.668952
HRH2	0.202275	0.361917	0.027652	0.503488	0.206897	0.532959
MXD3	-0.413062	0.563163	-0.215849	0.503375	0.491797	0.880818
DEDD2	0.169591	0.375759	-0.0632739	0.503339	0.0337107	0.842622
SNX17	0.00171658	0.662722	0.218463	0.503213	0.523145	0.807306
CLDN22	-0.134856	0.22156	0.183695	0.503161	0.310872	0.686486
TMEM173	-0.544977	0.518963	0.607589	0.503061	0.665094	0.549079
OSBPL2	-0.239442	0.674345	0.934566	0.50299	0.767035	0.941703
KREMEN2	-0.197118	0.195196	-0.186081	0.502988	0.401306	0.157064
PDHX	-0.271358	0.602428	0.109588	0.502932	-0.138497	0.626189
GPN1	0.19614	0.706782	0.239794	0.502624	0.0149227	0.888827
NLK	-0.566928	0.640328	0.282085	0.502482	0.176603	0.95169
RBFOX3	-0.024026	0.51685	-0.0283166	0.502426	0.108256	0.683754
TXNDC16	-0.340839	0.00969154	0.601619	0.502398	0.0127415	0.398102
SIAH3	0.000248566	0.00969154	0.0685608	0.502398	0.708104	0.398102
TGFBR1	0.411139	0.00969154	-0.0850242	0.502398	0.219922	0.398102
USP30	-0.74361	0.572502	0.413687	0.502143	0.136289	0.817977
FAM132B	0.173477	0.473631	0.229574	0.501785	-0.0834165	0.447384
KDR	-0.0626236	0.660976	0.755739	0.501554	0.164044	0.670043
MIR599	0.0714472	0.418113	0.152354	0.501505	0.418826	0.393505
NUP153	-0.487643	0.251165	0.710261	0.501484	0.439985	0.673662
TRAF5	-0.357539	0.641985	0.221574	0.501387	0.247102	0.952084
MST1P2	-0.0397282	0.426986	-0.0573419	0.50135	-0.264335	0.541368
TP53INP2	-0.307753	0.688836	0.672134	0.501126	0.530113	0.90713
NARF	-0.0580411	0.608786	0.658493	0.501059	0.328798	0.890408
IKZF1	-0.206803	0.56629	0.363174	0.501013	0.541094	0.663022
C12orf76	-0.113752	0.695598	0.26757	0.500818	0.451452	0.696158
RASD1	0.656616	0.507332	0.107085	0.500507	-0.0829495	0.655341
TUBA4A	-0.00230825	0.649115	0.179957	0.500446	0.259072	0.798053
CNN2	0.33284	0.737033	0.622107	0.500395	0.290364	0.838636
SERHL2	-0.164835	0.522028	0.385051	0.500354	-0.0159724	0.822577
ANKS4B	-0.312009	0.686166	-0.0839997	0.500337	-0.0602153	0.922933
IGSF6	-0.326585	0.704406	0.0949772	0.500324	0.148128	0.896442
RREB1	-0.272336	0.563632	0.686587	0.500319	0.381544	0.819232
IBTK	0.266879	0.351942	-0.292986	0.5003	-0.157132	0.444458
CCNT1	0.493341	0.623154	0.207017	0.500226	0.109819	0.605396
RRAGB	0.505823	0.623154	-0.0964736	0.500226	-0.389339	0.605396
CPAMD8	0.101381	0.623154	-0.144983	0.500226	0.393892	0.605396
CREBL2	-0.259221	0.415781	0.36417	0.500178	0.718274	0.478246
SLA2	-0.322451	0.548886	0.515145	0.500176	0.696714	0.890533
UBE2D4	-0.0718294	0.690589	0.322418	0.499763	0.247589	0.920958
BZRAP1	-0.0605604	0.581786	-0.118097	0.499658	0.452307	0.804511
POU5F1P4	-0.101705	0.521147	0.448014	0.499442	0.295781	0.498046
ZBTB40	0.148149	0.719155	0.6169	0.499342	0.0256918	0.818217
PDE4B	0.0100885	-0.493608	0.467437	0.499305	0.383159	0.0536202
RNF31	0.149814	-0.0256166	0.520466	0.499153	0.400275	0.593353
GPER	0.517486	0.280065	-0.109597	0.498993	-0.206095	0.721094
CCDC122	-0.349857	0.662219	0.443402	0.498975	0.11898	0.724288
PTBP1	-0.055058	0.707817	0.313403	0.498973	0.569069	0.880145
UBR7	0.321278	0.680005	-0.730791	0.498954	-0.280257	0.780053
ZNF584	0.373362	0.517729	0.0468056	0.498593	-0.139948	0.927177
PHF23	-0.332262	0.222951	0.438696	0.498392	0.0471232	0.156355
PGK1	-0.556706	0.545204	0.0671121	0.498207	0.281505	0.813827
TMEM223	-0.00936628	0.689985	0.208322	0.498087	0.107028	0.911893
FAM177B	-0.229211	0.0993256	0.644807	0.497995	0.0653822	0.0501563
E2F4	-0.150189	0.658464	0.8071	0.497766	0.499622	0.885914
MBD5	0.106465	0.210602	0.233322	0.49762	-0.444661	0.666835
NDUFA5	-0.0572327	0.656514	0.305206	0.497493	-0.378067	0.798698
TRPT1	-0.065541	0.621668	-0.413593	0.49736	0.168332	0.873929
SCN3B	0.440322	0.679835	-0.0247371	0.497339	-0.148233	0.806695
BCL2L2	0.0894044	0.640598	0.383175	0.497337	0.0286811	0.880703
HK2	-0.198086	0.652069	0.597837	0.497315	0.533254	0.734016
R3HCC1	0.478823	0.423057	0.391569	0.497267	-0.270627	0.209766
DSCR9	-0.309903	0.513202	0.359671	0.497133	-0.343081	0.821114
ASL	0.125332	0.117081	0.304801	0.496906	-0.121456	0.661357
PPARGC1B	0.493341	0.117081	0.207017	0.496906	0.109819	0.661357
SORT1	0.493341	0.117081	0.207017	0.496906	0.109819	0.661357
PRMT5	0.670961	0.117081	0.183283	0.496906	-0.050152	0.661357
SNORD44	0.646093	0.117081	0.00395462	0.496906	-0.0305002	0.661357
SF3B5	0.101381	0.117081	-0.144983	0.496906	0.393892	0.661357
CASC3	-0.226822	0.429011	0.413266	0.496721	0.00851814	0.581301
DCP2	0.0633566	0.644218	0.447749	0.496646	0.467688	0.908618
EXOC3L2	-0.308785	0.653164	0.116686	0.496439	0.0590273	0.81119
ZFAT-AS1	-0.0138671	0.539852	0.583855	0.49607	0.088973	0.77309
SCRG1	-0.00803831	0.531793	-0.347533	0.495985	0.0153514	0.877434
PRSS8	-0.228233	0.394432	0.429087	0.495898	0.334485	0.752553
DCAF13	-0.0467967	0.704652	-0.245591	0.495679	-0.228455	0.86544
NDUFB10	-0.103739	0.64654	0.477327	0.495669	0.191781	0.795002
RUFY3	-0.645301	0.576519	-0.118931	0.495661	0.250829	0.621228
KCTD14	-0.0854471	0.614146	0.645152	0.4956	0.213554	0.84908
AKIP1	-0.125142	0.41748	0.644945	0.495391	0.178447	0.807524
DICER1	-0.191634	0.557674	-0.259049	0.494991	0.0805893	0.648748
LRRN1	-0.107656	0.73326	-0.471828	0.494927	0.267103	0.814562
PFN2	-0.455449	0.599122	-0.154038	0.494844	0.460696	0.785801
UHRF1BP1L	-0.818801	0.296828	0.441556	0.494837	0.696637	0.551147
KRBA1	-0.406896	0.310021	0.782478	0.494685	0.642534	0.601304
UTP18	0.137963	0.642817	0.41275	0.494574	-0.125521	0.905761
SNORA25	-0.262987	0.357055	0.412312	0.494341	0.117921	0.795549
RPS15AP10	0.554644	0.441114	0.671052	0.493839	0.0668085	0.884676
IFT20	-0.420089	0.18231	-0.183374	0.493671	0.446615	0.526068
CHID1	0.0749163	0.445429	0.518868	0.493619	0.50741	0.71692
CDADC1	0.113414	-0.0673664	0.737536	0.49352	0.293765	0.489253
ZKSCAN3	-0.33345	0.46513	0.720017	0.493471	0.614727	0.797738
SENP8	0.113291	0.682213	-0.217105	0.493346	-0.394951	0.725042
UBXN8	-0.493382	0.476592	0.0703336	0.493287	0.22065	0.623603
MGC2752	-0.401283	0.577568	0.510761	0.492945	0.0743528	0.762701
TBC1D25	-0.272315	0.625214	0.750816	0.492682	0.641331	0.668468
ELL3	0.0749096	0.671562	0.441304	0.492571	0.397362	0.834125
LOC155060	-0.21817	0.595891	-0.105712	0.492559	-0.281934	0.840486
ZC3H11A	-0.376661	0.195221	0.568443	0.492513	0.137296	0.418025
EDEM1	-0.265397	0.514165	0.335354	0.492469	0.439368	0.806394
CNOT6L	0.375985	0.326904	0.2353	0.491968	-0.283331	0.413965
FOXJ2	0.0334371	0.504234	0.570263	0.491829	0.364088	0.80803
PRICKLE4	0.151316	0.526572	0.393301	0.491459	-0.0015229	0.626587
TOB2	-0.569563	0.591852	0.36872	0.491325	0.0978792	0.546729
TMEM105	-0.0167395	0.631176	0.751227	0.491106	0.25314	0.776524
OGFR	-0.427333	0.708252	0.0465677	0.491063	0.584802	0.891668
REEP1	0.0621839	0.445626	-0.0209457	0.490855	-0.343579	0.668463
GPANK1	-0.387747	0.667351	0.39502	0.490817	0.181154	0.872557
CKB	-0.362837	-0.0440994	-0.476775	0.490661	0.056755	0.542304
FMO5	-0.323489	0.684014	0.510251	0.490477	0.2187	0.881749
TMEM11	-0.610701	0.506456	0.497627	0.490434	0.317085	0.437983
PBX2	-0.543001	0.577569	0.352161	0.490368	0.298907	0.814287
PPID	-0.487417	0.654672	0.513284	0.490312	0.510427	0.894899
SMU1	-0.263134	0.689677	0.569417	0.490304	0.518145	0.907043
MZF1	-0.451931	0.449896	0.475391	0.490261	0.185628	0.597611
SUGP1	0.421491	0.328726	0.205747	0.490147	-0.242471	0.77953
NDRG3	-0.381306	0.635473	0.687464	0.49013	0.695219	0.795803
RNPEP	0.160708	0.304898	-0.0250164	0.489956	0.43396	0.573342
CAMTA2	-0.42251	0.673549	0.477374	0.489463	-0.0525488	0.723135
KLHL30	0.596262	0.653949	-0.362942	0.489397	0.00245772	0.79883
NAIP	-0.322842	0.398058	0.641408	0.489214	0.367614	0.653699
MRPS18A	0.413127	0.524441	0.56417	0.489214	0.218527	0.640721
ARID4B	0.110903	0.750535	0.387073	0.488925	0.0926167	0.868985
HAS1	0.0761246	0.433797	-0.274103	0.488797	0.388781	0.736716
ENDOV	0.294292	0.00618725	0.386032	0.488312	0.401047	-0.0767426
RNH1	-0.0968116	0.638662	0.593632	0.48827	0.412613	0.79736
NME1-NME2	-0.458477	0.164499	0.149399	0.488158	0.038259	0.124341
TLR4	0.339347	-0.00356749	0.0912697	0.487948	-0.0988922	0.141453
LOC153684	-0.0668202	0.459187	0.435751	0.487891	0.170202	0.748272
GRAMD4	-0.423883	0.519634	0.139513	0.487854	-0.0270287	0.63926
COMMD2	-0.386074	0.702392	0.413972	0.487784	0.248378	0.826852
GPR132	0.0018683	0.674554	0.421417	0.487635	0.68283	0.723416
UPF2	-0.36526	0.704573	0.534007	0.487634	0.275865	0.80398
ZNF732	-0.280362	0.392054	0.129299	0.487596	0.0219087	0.677049
ZNF711	0.820211	0.617386	-0.220923	0.487368	-0.238647	0.620671
SPATC1	-0.646093	0.509941	-0.00395462	0.487047	0.0305002	0.596765
ST6GALNAC6	-0.67346	0.509941	-0.260059	0.487047	0.155509	0.596765
ZNF33A	0.212822	0.622269	0.340925	0.487035	-0.124302	0.786421
CHMP4A	0.330073	0.558769	0.506154	0.486747	0.0973362	0.639522
HSD11B2	-0.562083	0.706837	0.207444	0.486625	0.561231	0.69362
TOE1	-0.215251	0.696235	-0.00740323	0.48658	0.449522	0.885902
KIAA1407	0.0367879	0.65108	0.00243224	0.486551	0.115108	0.87038
LOC100499194	0.163853	0.708434	-0.0486856	0.486278	0.261437	0.813465
ATP1B1	0.000308897	0.607353	0.566137	0.486241	0.769594	0.951405
LOC100507373	-0.382973	0.167606	0.429995	0.486153	0.359189	0.656208
PROCR	-0.0601844	0.387356	0.270411	0.48606	0.561482	0.880112
CELF1	-0.180456	-0.180885	0.780685	0.485755	0.217054	-0.0278853
SGPP2	-0.500836	0.651602	0.418423	0.485666	0.535921	0.912543
JMJD6	-0.144226	0.71054	0.57147	0.485349	0.171187	0.927135
ZCCHC16	-0.352998	0.435209	0.21275	0.485228	0.255214	0.798373
MFAP4	0.240528	0.660136	0.0870832	0.484831	0.506664	0.962584
EID2	0.308665	0.535863	-0.0162638	0.484788	-0.0790061	0.891685
NOS1	-0.171741	0.600854	0.701536	0.484658	0.442989	0.954236
LYSMD1	-0.384268	0.531703	0.372534	0.484527	0.164598	0.859559
RUNDC1	0.173351	0.672926	0.0543953	0.484499	0.345296	0.932976
TRABD	0.1872	0.61621	0.200581	0.484416	0.329031	0.949643
DDX11L2	-0.455373	0.675148	0.259565	0.484382	0.169482	0.91244
MAVS	-0.35828	0.647438	0.362071	0.484377	0.101109	0.916089
SNCG	-0.451417	0.240381	0.33812	0.484336	0.489608	0.13846
TAF1C	-0.0440443	-0.674773	0.363875	0.48424	0.392128	-0.404594
CST3	-0.132672	0.583397	-0.286412	0.484071	0.193976	0.740361
POLR3C	-0.190743	0.0657222	-0.129472	0.483981	0.124418	0.597937
NOSIP	-0.27886	0.548447	0.730923	0.483852	0.233108	0.433243
TNFRSF21	-0.228564	-0.315274	0.661047	0.483694	0.426173	-0.167033
MAX	-0.217875	0.73432	0.23992	0.483667	0.642254	0.892198
ZNF428	-0.486056	0.664884	0.534276	0.483484	0.192742	0.787693
RILP	-0.330729	0.368866	0.70665	0.483334	0.684909	0.830605
PDXK	-0.174959	0.697819	0.478018	0.483315	0.115078	0.90557
FCHSD2	-0.679081	0.737122	0.343575	0.483275	0.727176	0.89592
LRSAM1	-0.11192	0.299178	0.0034248	0.483046	0.737737	0.296656
C21orf2	-0.302438	0.695743	0.262984	0.482656	0.396241	0.918964
ABCC3	-0.291432	0.705047	-0.255004	0.482545	0.308149	0.814714
NUP50	-0.12546	0.675021	0.0751968	0.482221	0.0475907	0.913638
LOC100506241	-0.673083	0.667984	0.608963	0.482217	0.446855	0.899887
ARID5B	0.459438	0.134999	0.737338	0.482188	0.202529	0.487188
PPP1R8	0.242751	0.455303	-0.359851	0.481985	-0.485114	0.872826
MSX2P1	-0.325081	0.318201	0.549304	0.48195	0.435637	0.591778
FAM13B	0.605159	0.659932	0.136267	0.481936	-0.346446	0.71159
SNAP47	-0.371518	0.565773	-0.301391	0.481799	0.234271	0.858875
TICAM2	0.137581	0.440171	0.482684	0.481737	0.0682311	0.575751
ATXN2L	-0.370473	0.592448	0.759173	0.481637	0.261628	0.849668
TCL1B	0.0710739	0.0277479	0.600592	0.481221	0.177629	0.166627
CDIPT	-0.387938	0.0225179	0.0365802	0.481218	0.496029	0.512794
LSAMP	0.116476	0.507168	0.617605	0.481178	0.0936073	0.680527
C14orf132	-0.105895	0.722303	0.436507	0.481167	0.485696	0.89387
C15orf39	-0.0241788	0.23294	0.565849	0.480962	0.21316	0.415714
HIST1H4B	-0.2054	0.512756	-0.623412	0.480896	-0.644461	0.542472
INTS1	-0.199457	0.634077	0.17155	0.480807	0.468071	0.874702
GPBAR1	0.08763	0.719309	0.280858	0.480689	-0.25546	0.872032
BRSK2	-0.059432	0.603434	0.690251	0.480489	0.191873	0.867104
TMPRSS11BNL	-0.0312843	-0.0119879	0.172477	0.480401	0.534825	0.154632
LOC653513	-0.105876	0.688927	0.232281	0.480381	-0.392895	0.882754
TMEM165	-0.128603	0.641564	0.368942	0.480222	0.02308	0.871944
LOH12CR2	0.872034	0.731902	-0.182692	0.479918	-0.389371	0.878263
SLC25A34	-0.0482014	0.712124	0.661822	0.479892	0.294669	0.841668
CACNA1D	0.398896	0.309485	0.511046	0.479676	0.21884	0.401044
CACNB3	-0.29723	0.39923	0.0314821	0.479676	-0.0308014	0.24913
PNPLA3	-0.0472748	0.631605	0.285957	0.47963	-0.079944	0.964435
ZNF513	-0.348248	0.718336	0.412506	0.47955	-0.0510099	0.904102
GPR114	0.118543	0.244085	-0.160642	0.479538	0.0296134	0.667889
ACTR3	-0.733517	0.702679	0.579159	0.479342	0.63297	0.80279
IMPAD1	0.0229289	0.645305	-0.00588553	0.479208	0.220088	0.927021
LOC388849	0.206106	0.53701	0.439593	0.479044	-0.10084	0.878433
SLC12A7	-0.432155	-0.34165	0.0331064	0.479014	0.334577	0.219856
SMYD2	0.431063	0.529628	0.182634	0.478572	-0.431227	0.751963
POLR3K	0.145094	-0.164574	-0.701944	0.47843	-0.300186	0.390428
RDX	-0.535735	0.128576	0.156399	0.478424	0.319748	0.494439
PLEKHF2	0.212273	0.128576	0.146808	0.478424	0.57209	0.494439
DYRK1A	0.112923	0.504122	0.209725	0.478315	0.164589	0.842602
SREBF1	0.758959	0.45918	0.0856408	0.478216	-0.0238577	0.86225
LOC100272216	0.22167	0.601826	-0.496464	0.478128	0.110409	0.763267
MTERFD2	-0.134906	0.59385	0.323868	0.478082	-0.0499648	0.906163
KRT10	0.289274	0.508422	0.137372	0.478056	-0.67008	0.83763
SIDT1	-0.264844	0.627303	0.417054	0.477944	0.0770571	0.913125
CARD9	-0.104771	0.596882	-0.00786027	0.477908	0.677411	0.973103
TNFSF12	-0.324547	0.549825	0.0493252	0.477823	0.0127415	0.892308
DNAH10	0.106391	0.591533	0.0364754	0.477637	-0.092104	0.812969
CNNM1	-0.190696	0.630227	0.218797	0.477463	0.081822	0.80299
CXCR2	-0.509613	0.636705	0.23536	0.477428	0.587782	0.903007
ALDH1B1	-0.344772	0.559472	0.666461	0.477384	0.0496935	0.676414
CCND2	-0.408272	0.542191	0.453545	0.477129	0.472404	0.838791
FGR	0.295831	0.454864	0.0848516	0.477054	0.207387	0.717796
KCTD12	-0.527677	0.495894	0.124061	0.476781	0.62545	0.884953
CCDC7	0.162715	0.640702	-0.274159	0.476769	0.152943	0.777918
MYO1F	0.106424	0.663225	0.278709	0.476749	0.429234	0.861769
TSEN2	-0.166486	0.554856	0.336445	0.476657	0.109008	0.709821
ACACB	-0.0769735	0.626492	0.0447581	0.476628	-0.152965	0.726479
TCF25	-0.243151	0.691283	0.559879	0.476616	0.281483	0.761997
TTC17	0.569188	0.189061	-0.0262568	0.476443	-0.101022	0.243351
C1orf35	0.0532036	0.707112	0.564891	0.476374	0.111473	0.822602
TDRD6	-0.395502	0.527811	0.0874534	0.476273	0.0452686	0.735656
SYK	-0.334	0.72486	0.645887	0.476067	0.182573	0.818289
APOBEC3A	-0.15224	0.662838	0.622347	0.476047	0.369079	0.885846
C4orf3	0.0515761	0.606599	0.529662	0.476035	-0.019785	0.950541
CATSPER2	-0.288579	0.435824	0.71504	0.475899	0.392	0.829468
FMR1-AS1	0.154094	0.503038	-0.118386	0.475656	-0.283875	0.883334
PPP4R1	0.164627	0.576125	0.458822	0.475536	0.470496	0.689484
HMGN2P46	-0.0614154	0.729575	0.126906	0.475271	0.303044	0.925838
LRFN4	0.0471674	-0.0945806	0.0721717	0.475199	0.258449	0.491699
MRPL50	-0.455092	0.486473	-0.275125	0.475199	-0.175166	0.924104
PGAP2	-0.266525	0.685328	0.146021	0.475067	0.647118	0.943568
SPAG7	0.4088	0.265899	-0.0226763	0.475038	0.272799	0.57445
LRR1	-0.577055	-0.146681	-0.0785416	0.475017	0.00657774	0.421493
PRSS53	-0.697242	0.683842	-0.211481	0.474966	0.162394	0.762898
ATF5	-0.332982	0.630952	0.312852	0.474864	0.224136	0.801991
BAG6	-0.189366	0.441462	0.374818	0.474681	0.105236	0.742255
TUBA3E	0.118005	0.220333	-0.633007	0.474575	-0.66559	0.596837
PKIG	-0.307963	0.63796	0.401996	0.474529	0.274527	0.898873
PLA2G2D	-0.124651	0.746024	0.644244	0.474475	0.37879	0.896892
PRKAR2A	-0.417577	0.42799	-0.306483	0.474455	0.352625	0.739111
RASA4	-0.264244	0.575882	-0.138403	0.474255	-0.27504	0.91028
LTBP4	0.657857	0.242015	-0.280774	0.474226	-0.831786	0.402899
RELB	-0.165471	-0.373944	0.426441	0.474034	0.240641	-0.283762
AVL9	-0.146821	0.227802	0.15423	0.473835	0.0866847	0.455111
TUBA4B	-0.212497	0.711417	0.380233	0.473816	0.0871444	0.846166
RPL21P44	-0.665378	0.133449	0.475543	0.473717	0.704313	0.468999
SYN1	0.0435551	0.62173	0.151005	0.473642	0.175641	0.816593
MOBP	-0.384047	0.423674	0.381003	0.47364	-0.184279	0.506943
LRRC24	-0.164715	0.701172	-0.0254026	0.473495	-0.181898	0.932445
SNORD17	0.137097	0.677086	0.277664	0.47344	0.255572	0.845705
MRTO4	-0.191441	0.653106	0.168092	0.473427	0.421656	0.948825
ZNF574	-0.0709553	0.640994	0.380192	0.473312	-0.0875945	0.62778
CD5	-0.250809	0.612686	0.268984	0.473259	0.354389	0.892251
PNPLA4	-0.00555564	0.491319	0.232157	0.473251	0.208893	0.843186
DLG1	0.0239821	0.577549	0.426779	0.473156	0.236469	0.524457
RNF165	0.553612	0.145292	-0.347519	0.473089	-0.364648	0.703852
TFEB	-0.177178	-0.446564	-0.516419	0.472876	0.0624573	-0.0725088
ABO	-0.340839	-0.508361	0.601619	0.472589	0.0127415	-0.267229
MESP1	-0.340839	-0.508361	0.601619	0.472589	0.0127415	-0.267229
PTPRG	0.179943	-0.508361	0.501806	0.472589	-0.105812	-0.267229
C9orf57	-0.503489	-0.508361	0.398817	0.472589	-0.221715	-0.267229
FFAR1	-0.0197856	-0.508361	0.283744	0.472589	0.325068	-0.267229
OR56A1	-0.520496	-0.508361	0.189997	0.472589	0.786236	-0.267229
TMEM8B	0.386331	-0.508361	-0.0919243	0.472589	-0.302761	-0.267229
CD207	-0.377874	-0.508361	-0.363961	0.472589	-0.492063	-0.267229
FAM110B	0.464497	-0.508361	-0.507452	0.472589	-0.477501	-0.267229
SNX30	0.105452	0.203601	-0.302678	0.472441	0.170493	0.549566
ABCC1	0.126651	0.632305	-0.0811757	0.472429	0.374275	0.713207
LPCAT1	0.280779	0.607146	0.131977	0.472162	-0.016667	0.805399
ZNF7	-0.534138	0.69505	0.400471	0.472152	0.469519	0.943543
LRRC16B	0.342453	0.0453442	-0.714497	0.471999	-0.746616	0.491408
OFD1	-0.0368692	0.769026	0.578525	0.471719	0.215879	0.852442
ZNF672	-0.301284	0.650815	0.682388	0.471551	0.191216	0.755473
STRAP	0.0919793	0.58698	-0.109498	0.471474	0.439426	0.667123
RPS6KL1	0.0556974	0.674481	0.757188	0.471083	0.157567	0.96078
SCML2	0.207788	0.363952	0.0949108	0.470992	0.691338	0.864431
EIF2S1	0.35204	0.623458	0.33136	0.470844	0.053518	0.480264
SNX8	0.242085	0.411725	0.236644	0.47072	0.255723	0.67794
DTWD2	-0.307902	0.738205	0.0993964	0.470691	0.174482	0.903021
TMOD1	-0.259328	0.628822	0.0153876	0.470646	-0.0411685	0.837638
LOC100506801	-0.460688	0.594829	0.826799	0.47063	0.618494	0.764106
PGAM1	-0.408156	0.710226	0.458155	0.47062	0.131847	0.863142
PTPN7	-0.678401	0.332397	0.407288	0.470556	0.230852	0.675341
ITPKC	0.527973	0.595194	-0.0944155	0.470533	0.0859543	0.629655
ZFP36	-0.272775	0.572159	0.545238	0.470389	0.714518	0.731637
SLC25A37	-0.662772	0.241734	-0.101983	0.470316	0.586976	0.0889925
C4orf17	0.649831	0.246809	-0.457781	0.470281	-0.595935	0.185645
GIPC3	-0.0863263	0.409663	0.467436	0.470247	-0.00192633	0.639648
COQ10A	0.887222	0.709024	-0.123096	0.470109	-0.577589	0.8322
ZNF791	0.0672992	0.746058	0.237978	0.470098	0.412502	0.863517
CALHM1	0.158432	0.65992	-0.349144	0.469969	-0.0744032	0.764593
TMEM150C	0.0112083	0.120554	0.634112	0.469823	0.2171	0.557316
B3GAT2	-0.447198	0.644229	-0.0333219	0.469689	0.292821	0.90456
FAM136A	-0.40226	0.486119	0.227236	0.469539	-0.488891	0.65134
TM6SF1	-0.337016	0.453871	0.466885	0.469489	0.369078	0.68884
HCFC1	-0.00505213	0.678229	0.444151	0.469437	0.236857	0.694132
FKBP10	-0.123373	0.307705	0.677268	0.469277	-0.0347335	0.813133
VPREB3	0.0173823	0.307705	0.304976	0.469277	0.123264	0.813133
POM121C	-0.328497	0.516945	0.650083	0.469243	0.388554	0.617097
AHNAK2	0.324377	0.295444	0.0166808	0.469158	-0.146534	0.687795
NOXA1	0.160708	-0.153797	-0.0250164	0.469157	0.43396	0.0805466
EPHX4	0.342794	-0.153797	-0.170009	0.469157	-0.467948	0.0805466
CAPNS1	0.169637	0.247983	0.496313	0.469102	0.276431	0.310908
CEP63	-0.650492	0.647259	-0.312903	0.469081	0.364123	0.879981
LOC100133445	-0.380356	0.512775	-0.036493	0.469069	0.480687	0.886385
GPR62	0.625542	0.148167	-0.0435008	0.468742	-0.544188	0.559901
CUL9	-0.190655	0.616473	0.493202	0.468533	0.355883	0.911085
ABCB8	0.0591212	0.21134	-0.050115	0.468488	0.37831	0.358421
RPRML	-0.601342	0.123073	0.276837	0.468403	-0.056755	0.0472345
SNAI3	-0.459168	0.516987	0.343935	0.468355	-0.161108	0.789003
KLHL29	0.363232	0.669706	0.468563	0.468329	0.136225	0.96524
MCPH1	0.101745	0.556125	0.556882	0.468268	0.195874	0.861873
C10orf10	-0.739779	0.652814	0.120705	0.468182	0.175865	0.950893
PMP2	-0.25826	0.512691	0.103139	0.468071	-0.26572	0.692302
GUCY2D	0.52421	-0.0107464	-0.0842389	0.467636	-0.157088	0.347149
PBLD	0.0433496	0.501631	0.520104	0.467497	0.208091	0.879935
TRMT1	-0.20545	0.571886	0.668901	0.467477	-0.0120485	0.619115
HDAC1	-0.130821	0.674897	0.252433	0.467414	0.594128	0.944326
ACTA1	0.663653	-0.247083	0.139769	0.467116	-0.215896	0.237931
AKIRIN2	-0.290804	0.387499	0.672447	0.466849	0.156129	0.505698
SLC30A5	-0.0795865	0.564469	0.466488	0.46684	0.256186	0.801181
LRRC16A	-0.437827	0.621704	-0.332719	0.466718	0.436451	0.886735
DLEU2	0.0372919	0.605673	0.237833	0.466246	0.167317	0.90822
IMPDH1	-0.531475	0.735577	0.577851	0.466194	0.811129	0.879132
DOK3	-0.421455	0.514536	-0.376153	0.465936	0.406911	0.621072
ZDBF2	0.423053	0.713056	-0.16082	0.465636	-0.0486018	0.698169
FGFR3	-0.575517	0.653516	0.419835	0.465452	0.384114	0.760369
EXOC7	-0.494587	0.550848	0.717181	0.465357	0.604711	0.723858
SLC25A14	-0.128483	0.33775	0.660792	0.465344	-0.083027	0.220116
EP400NL	-0.0556838	0.558257	-0.0621145	0.465296	-0.512842	0.657381
PSKH1	0.0713919	0.706874	0.124542	0.465185	0.241973	0.938084
TAS2R42	-0.207207	0.631998	0.413242	0.465162	0.381974	0.506155
HCG22	-0.367576	0.724924	0.841034	0.464945	0.815	0.845932
LOC100505636	-0.409563	0.749354	0.0129314	0.464944	0.402894	0.85417
TRMT2B	0.00593178	0.59648	0.295332	0.464855	0.281045	0.918524
C11orf54	-0.172317	0.547099	0.18035	0.464647	0.328599	0.837219
LOC285033	-0.815392	0.381592	0.309974	0.464617	0.682672	0.901516
SH3BGRL	-0.748047	0.469281	0.0620302	0.4644	0.382851	0.920053
ODZ4	-0.256742	0.117996	0.473979	0.464391	0.253127	0.354543
RFX4	0.0724908	-0.02328	0.195513	0.464343	-0.0408785	0.173494
SSBP4	0.0139424	0.557316	0.638833	0.464334	0.0144493	0.870379
MTUS2	-0.311827	0.641216	0.159807	0.464164	0.46758	0.814003
ARL13A	0.185578	0.403377	0.689377	0.464017	0.0113044	0.441815
RIPK2	-0.474876	0.608982	0.596834	0.463991	0.607922	0.41741
FXYD7	0.0535495	0.28029	-0.348017	0.463991	-0.0956621	0.802173
ABHD2	-0.611687	0.667067	0.558682	0.463776	0.604753	0.943546
ZNF710	0.122463	0.59753	0.588096	0.463711	0.0972736	0.859097
STX3	0.000810231	0.718906	0.220543	0.463688	-0.115989	0.874351
RARA	-0.433168	0.574784	0.74846	0.463459	0.515246	0.855431
C9orf142	-0.779213	0.100252	0.227465	0.463423	0.427677	0.0244738
RGS10	-0.27941	0.594017	0.302678	0.463292	0.137729	0.810421
SFSWAP	-0.283984	0.571926	0.614689	0.463033	0.572396	0.871789
C17orf65	-0.338022	0.628515	0.692684	0.462911	0.412981	0.921181
PROCA1	-0.204606	0.615388	0.142209	0.462764	0.276576	0.68334
SLC16A2	-0.327468	0.723199	0.223105	0.4627	0.0783367	0.711693
ELN	-0.146781	-0.276325	0.82452	0.462598	0.510224	0.339157
SSX5	0.386331	-0.276325	-0.0919243	0.462598	-0.302761	0.339157
NR0B2	0.50084	-0.276325	-0.527328	0.462598	-0.204515	0.339157
PSMD3	-0.36089	0.724838	0.638011	0.462579	0.899488	0.891325
CD69	-0.337365	0.507199	0.465257	0.462287	0.382556	0.678267
RASSF4	0.421958	0.423544	0.173489	0.462227	0.0130682	0.651513
PIGO	0.291571	-0.159705	0.136464	0.462003	-0.229545	-0.0172223
MBD6	-0.552119	0.676897	0.238515	0.461917	0.214202	0.860025
FLG2	-0.395691	0.714442	0.585219	0.461896	0.179807	0.812024
ANKIB1	0.605699	0.747468	0.158963	0.461873	-0.325606	0.700588
ZBTB7B	0.0579884	0.515606	0.131428	0.461851	0.238749	0.801477
LYL1	-0.149164	0.43275	-0.308656	0.461698	0.352514	0.547862
LILRB1	-0.0461026	0.573501	0.418531	0.461469	-0.000842132	0.945383
ZNF496	-0.015058	0.0704244	0.658636	0.461257	0.207474	0.520167
NAV1	-0.180549	0.689726	0.139027	0.460917	-0.0157109	0.947199
SPCS1	-0.0419332	0.513428	0.314089	0.46082	0.723299	0.77319
ZMPSTE24	0.0881898	0.513428	-0.119868	0.46082	-0.291943	0.77319
ZNF543	0.0923993	0.547922	0.389703	0.460457	0.0785412	0.846475
COG1	-0.625616	0.626224	0.25106	0.460425	0.220003	0.862995
TLE3	-0.241422	0.67642	0.279885	0.460211	0.399156	0.917031
PPP1CA	-0.0928091	0.704198	0.278472	0.460097	0.102045	0.727249
DYSF	0.291376	0.392481	0.135401	0.460044	0.121355	0.430788
PRR4	-0.157497	0.565244	0.382	0.459981	-0.260224	0.912577
ACTN1	-0.392117	0.727582	0.564092	0.459797	0.698259	0.826443
GPD1	0.105295	0.569827	0.159025	0.459687	-0.289665	0.807912
MORN4	-0.466843	0.702844	0.26558	0.459595	0.634643	0.924841
KDM6B	-0.00367174	0.521327	0.0416684	0.459507	0.251164	0.916996
NDUFA2	-0.610636	0.634862	0.502726	0.45947	0.318739	0.864903
PARP9	-0.290792	0.513456	0.284767	0.459361	-0.0209265	0.879471
C4orf42	-0.310438	0.323229	0.4906	0.459358	0.880552	0.619337
FAM166B	-0.265869	0.232173	0.71282	0.459344	0.20708	0.69076
GPR150	-0.271775	0.309483	0.182102	0.459216	-0.174463	0.608216
RPS16	-0.270452	0.232241	0.541171	0.459194	0.29884	0.674917
NSMCE4A	-0.277603	-0.0128874	-0.544362	0.459185	-0.533384	-0.0180483
GIF	-0.652019	0.168079	-0.10614	0.459155	0.575381	0.665962
TRIM23	-0.0203188	0.375746	0.543925	0.459016	0.322929	0.617035
FLJ36777	-0.364892	0.673721	0.235422	0.459	-0.00836806	0.827378
LOC730227	-0.351523	0.680698	0.177062	0.458952	-0.0256655	0.827933
BGN	0.180284	0.342347	0.544964	0.458794	-0.244509	0.662665
TJP2	0.724911	0.444756	-0.149486	0.458734	-0.21385	0.618918
GPR108	-0.279477	-0.319109	-0.327171	0.458575	0.162319	-0.218237
NHSL1	-0.752313	0.622263	0.16188	0.458573	0.476406	0.868638
LOC100188947	-0.371722	0.534246	0.622955	0.458227	0.180317	0.947907
[truncated: 12,165 more rows]

## Sheet: P composite
	Pc
TSIX	-0.068979
BEST1	0.0745017
ADAMTSL4	0.134992
RBMS1	0.142193
DOK6	0.158398
MTRNR2L1	0.185325
PTGER2	0.188459
A2M	0.200013
C5orf56	0.200873
MXD3	0.235121
ATP6V1C2	0.23862
NCAPH2	0.245703
DTX4	0.246512
SNX22	0.254374
PZP	0.262364
GLS	0.270861
HLA-DPA1	0.304362
MIR1282	0.309335
MYH11	0.310659
MYH10	0.317429
RABEP1	0.33125
UBXN11	0.333467
ICA1L	0.338282
USP34	0.341913
PYROXD1	0.342841
KRR1	0.345121
TMEM140	0.348132
IL24	0.353345
TAP1	0.354841
LOC100129931	0.358478
RFTN1	0.359484
ERAP1	0.359983
NAIP	0.363025
LOC100129034	0.365054
SPDYE7P	0.368356
PHC1	0.368368
NR2C2	0.369478
LIMK2	0.371792
LOC284889	0.372238
PDAP1	0.375458
TRIM13	0.376986
CFLAR-AS1	0.377922
OPA3	0.382355
MMP24	0.382366
ARG2	0.383735
AGBL5	0.384157
KHNYN	0.384837
POLR3H	0.384942
LOC100294362	0.386614
PPAN	0.390313
TMEM200B	0.392155
ATP1A1OS	0.392224
LRTOMT	0.393262
CC2D2A	0.393798
CIDEB	0.393953
CNTD1	0.395273
LOC100507463	0.395438
SUPT4H1	0.398243
CCDC84	0.398716
ATP8B1	0.399334
TTC19	0.400061
C17orf72	0.400521
JMJD8	0.400853
PGM3	0.40264
CERKL	0.402758
ZNF471	0.402909
HEATR1	0.402998
LOC100506321	0.403034
CEPT1	0.405111
SLC12A6	0.405187
COG5	0.40694
ABCC9	0.407489
LOC100379224	0.408136
HIST1H1E	0.408483
LGALS8	0.409093
ZNF793	0.409694
CLSTN1	0.41113
ESRG	0.411751
PCGF3	0.412119
SLC46A1	0.412568
TMEM14E	0.413243
GTPBP1	0.413575
CFLAR	0.413846
GATC	0.414032
ESRP2	0.41532
TMEM120B	0.416382
DMTF1	0.416605
ARL17A	0.417299
ANKRD36BP1	0.417732
RHOQ	0.417823
LOC100289511	0.417838
FAN1	0.418144
POLR2E	0.418209
CCDC73	0.418301
PSIP1	0.41852
GNRHR2	0.418601
CNP	0.419108
REXO1L1	0.420965
TTN	0.421281
GPR82	0.422655
SYNC	0.423302
UGT8	0.423468
CD3EAP	0.423566
NRIP2	0.424008
STRADA	0.424877
ZNF264	0.42513
AP1G2	0.426501
ENTPD1	0.426775
NFE2L3	0.426775
MAB21L3	0.426887
BBS5	0.427114
PTCD1	0.42756
RASA1	0.428196
MFSD11	0.428984
C1orf56	0.430384
TAF9B	0.430516
GLIPR1L2	0.431071
ZHX3	0.432056
XRRA1	0.432187
SLC24A1	0.43249
FGF5	0.433605
ASB14	0.434024
ASTN2	0.434086
PODXL	0.43458
TOR1AIP2	0.435695
TMEM212	0.436184
MCC	0.436355
BBIP1	0.436534
MRPL53	0.437399
MAP3K3	0.437425
HEXIM1	0.437693
SCD5	0.437939
CEP68	0.437963
FANCA	0.438092
ACADSB	0.4386
GGCX	0.438876
DALRD3	0.439392
ORC4	0.439688
ANKRD20A9P	0.440253
SLC7A6	0.440432
CALML4	0.440709
ACOT13	0.440849
PGM5P2	0.440979
CD302	0.441206
GLIPR1	0.441388
TLCD2	0.442332
ZBTB8A	0.442415
KCNQ1OT1	0.442909
MASP2	0.443108
RGL4	0.443193
FAM13A	0.443379
DNAL1	0.443664
DPY19L2P2	0.444084
CYP20A1	0.446553
SDR39U1	0.449288
FAM196B	0.449479
POLH	0.449601
USP33	0.449922
ANKH	0.450863
CTSC	0.451072
LOC100131257	0.451072
KLRD1	0.451537
APOL4	0.451656
MCFD2	0.452948
LOC646214	0.453308
LPP	0.453365
UGGT1	0.453439
ODF2L	0.454524
C21orf62	0.454707
SHISA9	0.455069
GOSR1	0.457621
KIAA1456	0.457797
NCBP1	0.458526
LOC643406	0.460203
LOC286437	0.460889
PNPT1	0.461572
ORAI2	0.462077
MAP3K13	0.466064
